# Supplementary material for: Antibacterial Thiopeptide GE2270-Congeners from Nonomuraea jiangxiensis
Source: MDPI journal article supplement (doi:10.3390/molecules28010101), 2022-12-23
Supplement: s1 [file s1]

Supplementary information for

## Antibacterial Thiopeptide GE2270-Congeners from *Nonomuraea jiangxiensis*

Kuan-Chieh Ching <sup>†</sup>, Elaine J. Chin <sup>†</sup>, Mario Wibowo, Zann Y. Tan, Lay-Kien Yang,  
Deborah C. Seow, Chung-Yan Leong, Veronica W. Ng, Siew-Bee Ng <sup>\*</sup>  
and Yoganathan Kanagasundaram <sup>\*</sup>

Singapore Institute of Food and Biotechnology Innovation (SIFBI), Agency for Science,  
Technology and Research (A\*STAR), Singapore 138673, Singapore

<sup>\*</sup> Correspondence: ngsb@sifbi.a-star.edu.sg (S.-B.N.);

yoganathank@sifbi.a-star.edu.sg (Y.K.); Tel.: +65-869596 (S.-B.N.); +65-869508 (Y.K.)

<sup>†</sup> These authors contributed equally to this work.

**Table S1.** NMR spectral data of **3** and **4**.

**Table S2.** <sup>1</sup>H and <sup>13</sup>C NMR data of **5** and **6**.

**Table S3.** <sup>1</sup>H and <sup>13</sup>C NMR data of **7** and <sup>1</sup>H NMR data of **8** and **9**.

**Figure S1.** UV spectra for compounds **1–9**.

**Figure S2.** (+)-HRESIMS spectra for compounds **1–9**.

**Figure S3.** **A.** Extracted ion chromatogram ( $m/z$  1290.2653  $\pm$  5 ppm), **B.** (+)-HRESIMS spectrum, and **C.** MS/MS spectrum of GE2270A in the extract of *Nonomuraea jiangxiensis* strain A7611.

**Figure S4.** Selected COSY and HMBC correlations of **3** and **4**.

**Figure S5.** Selected COSY and HMBC correlations of **5** and **6**.

**Figure S6.** Selected COSY and HMBC correlations of **7**.

**Figure S7.** <sup>1</sup>H NMR spectrum (DMSO-*d*<sub>6</sub>, 400 MHz) of **1**.

**Figure S8.** <sup>13</sup>C NMR spectrum (DMSO-*d*<sub>6</sub>, 100 MHz) of **1**.

**Figure S9.** COSY spectrum of **1**.

**Figure S10.** HSQC spectrum of **1**.

**Figure S11.** HMBC spectrum of **1**.

**Figure S12.** <sup>1</sup>H NMR spectrum (DMSO-*d*<sub>6</sub>, 400 MHz) of **2**.

**Figure S13.** <sup>13</sup>C NMR spectrum (DMSO-*d*<sub>6</sub>, 100 MHz) of **2**.

**Figure S14.** COSY spectrum of **2**.

**Figure S15.** HSQC spectrum of **2**.

**Figure S16.** HMBC spectrum of **2**.

**Figure S17.** <sup>1</sup>H NMR spectrum (DMSO-*d*<sub>6</sub>, 400 MHz) of **3**.

**Figure S18.** COSY spectrum of **3**.

**Figure S19.** HSQC spectrum of **3**.

**Figure S20.** HMBC spectrum of **3**.

**Figure S21.**  $^1\text{H}$  NMR spectrum (DMSO- $d_6$ , 400 MHz) of **4**.

**Figure S22.**  $^{13}\text{C}$  NMR spectrum (DMSO- $d_6$ , 100 MHz) of **4**.

**Figure S23.** COSY spectrum of **4**.

**Figure S24.** HSQC spectrum of **4**.

**Figure S25.** HMBC spectrum of **4**.

**Figure S26.**  $^1\text{H}$  NMR spectrum (DMSO- $d_6$ , 400 MHz) of **5**.

**Figure S27.**  $^{13}\text{C}$  NMR spectrum (DMSO- $d_6$ , 100 MHz) of **5**.

**Figure S28.** COSY spectrum of **5**.

**Figure S29.** HSQC spectrum of **5**.

**Figure S30.** HMBC spectrum of **5**.

**Figure S31.**  $^1\text{H}$  NMR spectrum (DMSO- $d_6$ , 400 MHz) of **6**.

**Figure S32.**  $^{13}\text{C}$  NMR spectrum (DMSO- $d_6$ , 100 MHz) of **6**.

**Figure S33.** COSY spectrum of **6**.

**Figure S34.** HSQC spectrum of **6**.

**Figure S35.** HMBC spectrum of **6**.

**Figure S36.**  $^1\text{H}$  NMR spectrum (DMSO- $d_6$ , 400 MHz) of **7**.

**Figure S37.**  $^{13}\text{C}$  NMR spectrum (DMSO- $d_6$ , 100 MHz) of **7**.

**Figure S38.** COSY spectrum of **7**.

**Figure S39.** HSQC spectrum of **7**.

**Figure S40.** HMBC spectrum of **7**.

**Figure S41.**  $^1\text{H}$  NMR spectrum (DMSO- $d_6$ , 400 MHz) of **8**.

**Figure S42.**  $^1\text{H}$  NMR spectrum (DMSO- $d_6$ , 400 MHz) of **9**.

**Figure S43.** Dose response curve of compounds **1-9** against *Klebsiella aerogenes* (ATCC® 13048™), *Pseudomonas aeruginosa* (ATCC® 9027™) and *Acinetobacter baumannii* (ATCC® 19606™).

**Figure S44.** Dose response curve of compounds **1-9** against *Aspergillus fumigatus* (ATCC® 46645™).

**Figure S45.** Dose response curve of compounds **1-9** against A549 Human lung carcinoma cells (ATCC® CCL-185™).

**Table S1.** NMR spectral data of **3** and **4**.

| Residue               | Position              | <b>3</b>              |                                        | <b>4</b>              |                                           |
|-----------------------|-----------------------|-----------------------|----------------------------------------|-----------------------|-------------------------------------------|
|                       |                       | <sup>13</sup> C       | <sup>1</sup> H, mult. ( <i>J</i> = Hz) | <sup>13</sup> C       | <sup>1</sup> H, mult. ( <i>J</i> = Hz)    |
| Proline (Pro)         | α                     | 58.6, CH              | 4.25, m                                | 58.5, CH              | 4.24, m                                   |
|                       | β                     | 27.9, CH <sub>2</sub> | 1.92, m; 2.19, m                       | 27.9, CH <sub>2</sub> | 1.90, m; 2.19, m                          |
|                       | γ                     | 22.1, CH <sub>2</sub> | 1.88, m; 1.91, m                       | 22.1, CH <sub>2</sub> | 1.84, m; 1.91, m                          |
|                       | δ                     | 44.6, CH <sub>2</sub> | 3.40, m; 3.51, m                       | 44.8, CH <sub>2</sub> | 3.41, m; 3.51, m                          |
|                       | CO                    | 169.4, C              | -                                      | 169.3, C              | -                                         |
| Oxazoline (Oxa)       | α                     | 53.9, CH              | 4.55, m                                | 53.9, CH              | 4.55, m                                   |
|                       | β                     | 63.2, CH <sub>2</sub> | 4.54, m; 4.68, m                       | 63.2, CH <sub>2</sub> | 4.54, m; 4.68, dd (16.0, 8.0)             |
|                       | CN                    | 160.5, C              | -                                      | 160.1, C              | -                                         |
|                       | CO                    | 163.2, C              | -                                      | 163.2, C              | -                                         |
| Thiazole A            | 2                     | 167.9, C              | -                                      | 167.9, C              | -                                         |
|                       | 4                     | 147.2, C              | -                                      | 147.2, C              | -                                         |
|                       | 5                     | 132.5, CH             | 8.76, s                                | 132.8, CH             | 8.75, s                                   |
| Pyridine (Py)         | 2                     | 150.1, C              | -                                      | 150.1, C              | -                                         |
|                       | 3                     | 127.77, C             | -                                      | 127.6, C              | -                                         |
|                       | 4                     | 141.2, CH             | 8.44, d (8.2)                          | 141.3, CH             | 8.45, d (8.2)                             |
|                       | 5                     | 118.3, CH             | 8.27, d (8.2)                          | 118.4, CH             | 8.28, d (8.2)                             |
|                       | 6                     | 150.0, C              | -                                      | 150.0, C              | -                                         |
| Thiazole B            | 2                     | 160.5, C              | -                                      | 160.3, C              | -                                         |
|                       | 4                     | 153.2, C              | -                                      | 153.2, C              | -                                         |
|                       | 5                     | 122.8, CH             | 8.31, s                                | 123.1, CH             | 8.31, s                                   |
| Thiazole C            | 2                     | 170.7, C              | -                                      | 171.0, C              | -                                         |
|                       | 4                     | 146.4, C              | -                                      | 146.7, C              | -                                         |
|                       | 5                     | 116.4, CH             | 7.37, s                                | 116.3, CH             | 7.37, s                                   |
| Phenylserine (PheSer) | α                     | 58.1, CH              | 5.24, m                                | 58.0, CH              | 5.24, m                                   |
|                       | β                     | 73.3, CH              | 5.03, m                                | 73.6, CH              | 5.02, m                                   |
|                       | 1                     | 141.1, C              | -                                      | 141.6, C              | -                                         |
|                       | 2,6                   | 126.5, CH             | 7.29, (2H, m)                          | 126.6, CH             | 7.31, (2H, m)                             |
|                       | 3,5                   | 127.80, CH            | 7.29, (2H, m)                          | 127.8, CH             | 7.31, (2H, m)                             |
|                       | 4                     | 127.4, CH             | 7.24, m                                | 127.5, CH             | 7.25, m                                   |
|                       | NH                    | -                     | 9.00, d (7.7)                          | -                     | 9.01, d (8.0)                             |
|                       | OH                    | -                     | 6.03, d (4.3)                          | -                     | 6.03, d (4.5)                             |
| Glycine (Gly)         | α                     | 41.0, CH <sub>2</sub> | 3.88, dd (16.6, 4.0); 4.25, m          | 41.0, CH <sub>2</sub> | 3.81, dd (17.2, 4.0); 4.30 dd (17.2, 8.6) |
|                       | CO                    | 169.6, C              | -                                      | 169.4, C              | -                                         |
|                       | NH                    | -                     | 8.56, m                                | -                     | 8.46, m                                   |
| Thiazole D            | 2                     | 168.2, C              | -                                      | 165.4, C              | -                                         |
|                       | 4                     | 148.0, C              | -                                      | 143.7, C              | -                                         |
|                       | 5                     | 124.4, CH             | 8.29, s                                | 140.6, C              | -                                         |
|                       | 5-CH <sub>2</sub>     | -                     | -                                      | 67.2, CH <sub>2</sub> | 4.98, s                                   |
|                       | 5-CH <sub>2</sub> OMe | -                     | -                                      | 58.4, CH <sub>3</sub> | 3.39, s                                   |
|                       | CO                    | 160.4, C              | -                                      | 161.2, C              | -                                         |

|                  |           |                       |                     |                       |                               |
|------------------|-----------|-----------------------|---------------------|-----------------------|-------------------------------|
| Valine (Val)     | $\alpha$  | 55.4, CH              | 5.29, dd (8.0, 4.9) | 55.5, CH              | 5.26, s                       |
|                  | $\beta$   | 33.8, CH              | 2.22, m             | 33.9, CH              | 2.21, s                       |
|                  | $\gamma$  | 18.5, CH <sub>3</sub> | 0.87, d (6.9)       | 18.4, CH <sub>3</sub> | 0.86, d (6.6)                 |
|                  | $\gamma'$ | 17.7, CH <sub>3</sub> | 0.89, d (7.0)       | 17.7, CH <sub>3</sub> | 0.89, d (6.8)                 |
|                  | NH        | -                     | 8.76, d (8.0)       | -                     | 8.70, d (8.4)                 |
| Thiazole E       | 2         | 173.0, C              | -                   | 173.0, C              | -                             |
|                  | 4         | 148.4, C              | -                   | 148.6, C              | -                             |
|                  | 5         | 123.4, CH             | 8.10, s             | 123.3, CH             | 8.08, s                       |
|                  | CO        | 159.0, C              | -                   | 159.6, C              | -                             |
| Asparagine (Asn) | $\alpha$  | 48.0, CH              | 5.42, m             | 48.2, CH              | 5.37, m                       |
|                  | $\beta$   | 37.5, CH <sub>2</sub> | 1.50, m; 2.76, m    | 37.7, CH <sub>2</sub> | 1.35, m; 2.74, dd (16.5, 3.7) |
|                  | CONHMe    | 169.3, C              | -                   | 169.5, C              | -                             |
|                  | NHMe      | -                     | 7.48, m             | -                     | 7.40, m                       |
|                  | Me        | 25.3, CH <sub>3</sub> | 2.46, d (4.6)       | 25.6, CH <sub>3</sub> | 2.46, d (4.7)                 |
|                  | NH        | -                     | 8.81, d (9.0)       | -                     | 8.74, d (8.0)                 |
| Thiazole F       | 2         | 164.5, C              | -                   | 164.6, C              | -                             |
|                  | 4         | 149.3, C              | -                   | 149.2, C              | -                             |
|                  | 5         | 126.8, CH             | 8.61, s             | 126.9, CH             | 8.62, s                       |
|                  | CO        | 160.0, C              | -                   | 160.2, C              | -                             |

<sup>1</sup>H (400 MHz) and <sup>13</sup>C (100 MHz) in DMSO-*d*<sub>6</sub>. Assignments based on COSY, HSQC and HMBC and comparison with literature compounds. Chemical shifts ( $\delta$ ) in ppm. s: singlet; br s: broad singlet; d: doublet; br d: broad doublet; t: triplet, m: multiplet. One proton unless otherwise stated.

**Table S2.** <sup>1</sup>H and <sup>13</sup>C NMR data of **5** and **6**.

| Residue               | Position              | <b>5</b>              |                                        | <b>6</b>              |                                        |
|-----------------------|-----------------------|-----------------------|----------------------------------------|-----------------------|----------------------------------------|
|                       |                       | <sup>13</sup> C       | <sup>1</sup> H, mult. ( <i>J</i> = Hz) | <sup>13</sup> C       | <sup>1</sup> H, mult. ( <i>J</i> = Hz) |
| Proline (Pro)         | α                     | 59.8, CH              | 4.33, dd (8.6, 3.8)                    | 59.8, CH              | 4.33, dd (8.8, 3.6)                    |
|                       | β                     | 29.1, CH <sub>2</sub> | 2.08, m; 1.86, m                       | 29.3, CH <sub>2</sub> | 1.87, m; 2.09, m                       |
|                       | γ                     | 24.4, CH <sub>2</sub> | 1.92, (2H, m)                          | 24.4, CH <sub>2</sub> | 1.92, (2H, m)                          |
|                       | δ                     | 47.0, CH <sub>2</sub> | 3.77, (2H, m)                          | 47.1, CH <sub>2</sub> | 3.77, (2H, m)                          |
|                       | CO                    | 173.5, C              | -                                      | 173.6, C              | -                                      |
| Serine (Ser)          | α                     | 53.0, CH              | 4.90, dd (12.0, 4.0)                   | 53.0, CH              | 4.90, dd (12.0, 4.0)                   |
|                       | β                     | 61.7, CH <sub>2</sub> | 3.76, m; 3.82, m                       | 61.8, CH <sub>2</sub> | 3.80, m; 3.84, m                       |
|                       | CO                    | 168.9                 | -                                      | 168.9, C              | -                                      |
|                       | NH                    | -                     | 8.47, m                                | -                     | 8.47, m                                |
|                       | OH                    | -                     | 5.28, br t (6.0)                       | -                     | 5.28, m                                |
| Thiazole A            | 2                     | 167.3, C              | -                                      | 167.3, C              | -                                      |
|                       | 4                     | 150.8, C              | -                                      | 150.7, C              | -                                      |
|                       | 5                     | 127.6, CH             | 8.55, s                                | 127.5, CH             | 8.55, s                                |
|                       | CO                    | 160.1, C              | -                                      | 160.1, C              | -                                      |
| Pyridine (Py)         | 2                     | 150.3, C              | -                                      | 150.2, C              | -                                      |
|                       | 3                     | 127.7, C              | -                                      | 127.6, C              | -                                      |
|                       | 4                     | 141.3, CH             | 8.44, d (7.0)                          | 141.2, CH             | 8.46, d (6.8)                          |
|                       | 5                     | 118.5, CH             | 8.40, d (7.0)                          | 118.6, CH             | 8.41, d (6.8)                          |
|                       | 6                     | 150.1, C              | -                                      | 150.0, C              | -                                      |
| Thiazole B            | 2                     | 160.4, C              | -                                      | 160.3, C              | -                                      |
|                       | 4                     | 153.1, C              | -                                      | 153.2, C              | -                                      |
|                       | 5                     | 123.0, CH             | 8.30, s                                | 123.0, CH             | 8.30, s                                |
| Thiazole C            | 2                     | 170.9, C              | -                                      | 171.0, C              | -                                      |
|                       | 4                     | 146.7, C              | -                                      | 146.7, C              | -                                      |
|                       | 5                     | 116.3, CH             | 7.36, s                                | 116.3, CH             | 7.36, s                                |
| Phenylserine (PheSer) | α                     | 58.0, CH              | 5.24, m                                | 58.1, CH              | 5.24, m                                |
|                       | β                     | 73.5, CH              | 5.03, br t (4.0)                       | 73.7, CH              | 5.01, dd (6.2, 5.0)                    |
|                       | 1                     | 141.6, CH             | -                                      | 141.7, C              | -                                      |
|                       | 2,6                   | 126.6, CH             | 7.30, (2H, m)                          | 126.6, CH             | 7.31, m                                |
|                       | 3,5                   | 127.8, CH             | 7.27, (2H, m)                          | 127.8, CH             | 7.30, m                                |
|                       | 4                     | 127.8, CH             | 7.25, m                                | 127.7, CH             | 7.25, m                                |
|                       | NH                    | -                     | 9.01, d (8.3)                          | -                     | 9.01, d (7.8)                          |
|                       | OH                    | -                     | 6.02, d (4.5)                          | -                     | 6.03, d (4.6)                          |
| Glycine (Gly)         | α                     | 41.4, CH <sub>2</sub> | 3.87, m; 4.21, dd (16.6, 7.9)          | 41.1, CH <sub>2</sub> | 3.79, m; 4.26, dd (17.5, 8.6)          |
|                       | CO                    | 169.3, C              | -                                      | 169.3, C              | -                                      |
|                       | NH                    | -                     | 8.55, m                                | -                     | 8.44, m                                |
| Thiazole D            | 2                     | 168.4, C              | -                                      | 165.5, C              | -                                      |
|                       | 4                     | 148.3, C              | -                                      | 143.6, C              | -                                      |
|                       | 5                     | 124.5, CH             | 8.28, s                                | 140.8, C              | -                                      |
|                       | 5-CH <sub>2</sub>     | -                     | -                                      | 67.3, CH <sub>2</sub> | 4.98, s                                |
|                       | 5-CH <sub>2</sub> OMe | -                     | -                                      | 58.5, CH <sub>3</sub> | 3.38, s                                |
|                       | CO                    | 161.0, C              | -                                      | 161.2, C              | -                                      |

|                  |           |                       |                               |                       |                               |
|------------------|-----------|-----------------------|-------------------------------|-----------------------|-------------------------------|
| Valine (Val)     | $\alpha$  | 55.4, CH              | 5.24, m                       | 55.2, CH              | 5.20, m                       |
|                  | $\beta$   | 34.0, CH              | 2.20, m                       | 34.0, CH              | 2.18, m                       |
|                  | $\gamma$  | 18.4, CH <sub>3</sub> | 0.86, d (8.0)                 | 18.3, CH <sub>3</sub> | 0.85, d (6.8)                 |
|                  | $\gamma'$ | 17.7, CH <sub>3</sub> | 0.88, d (8.0)                 | 17.8, CH <sub>3</sub> | 0.88, d (6.8)                 |
|                  | NH        | -                     | 8.73, d (7.8)                 | -                     | 8.67, d (8.2)                 |
| Thiazole E       | 2         | 167.9, C              | -                             | 168.3, C              | -                             |
|                  | 4         | 141.7, C              | -                             | 141.9, C              | -                             |
|                  | 5         | 139.6, C              | -                             | 139.3, C              | -                             |
|                  | 5-Me      | 11.8, CH <sub>3</sub> | 2.60, s                       | 11.8, CH <sub>3</sub> | 2.59, s                       |
|                  | CO        | 160.3, C              | -                             | 159.8, C              | -                             |
| Asparagine (Asn) | $\alpha$  | 47.9, CH              | 5.37, m                       | 47.9, CH              | 5.31, m                       |
|                  | $\beta$   | 37.6, CH <sub>2</sub> | 1.50, m; 2.73, dd (16.4, 3.7) | 37.5, CH <sub>2</sub> | 1.37, m; 2.72, dd (16.4, 3.2) |
|                  | CONHMe    | 169.6, C              | -                             | 169.6, C              | -                             |
|                  | NHMe      | -                     | 7.48, m                       | -                     | 7.38, m                       |
|                  | Me        | 25.6, CH <sub>3</sub> | 2.46, d (4.6)                 | 25.7, CH <sub>3</sub> | 2.47, d (4.5)                 |
|                  | NH        | -                     | 8.77, d (9.0)                 | -                     | 8.70, d (8.7)                 |
| Thiazole F       | 2         | 164.7, C              | -                             | 164.7, C              | -                             |
|                  | 4         | 149.3, C              | -                             | 149.3, C              | -                             |
|                  | 5         | 126.8, CH             | 8.60, s                       | 126.9, CH             | 8.61, s                       |
|                  | CO        | 159.8, C              | -                             | 161.1, C              | -                             |

<sup>1</sup>H (400 MHz) and <sup>13</sup>C (100 MHz) in DMSO-*d*<sub>6</sub>. Assignments based on COSY, HSQC and HMBC and comparison with literature compounds. Chemical shifts ( $\delta$ ) in ppm. s: singlet; br s: broad singlet; d: doublet; br d: broad doublet; t: triplet, m: multiplet. One proton unless otherwise stated.

**Table S3.** <sup>1</sup>H and <sup>13</sup>C NMR data of **7** and <sup>1</sup>H NMR data of **8** and **9**.

| Residue                  | Position                  |                       |                                                    |                                                    |                                                    |
|--------------------------|---------------------------|-----------------------|----------------------------------------------------|----------------------------------------------------|----------------------------------------------------|
|                          |                           | <sup>13</sup> C       | <b>7</b><br><sup>1</sup> H, mult. ( <i>J</i> = Hz) | <b>8</b><br><sup>1</sup> H, mult. ( <i>J</i> = Hz) | <b>9</b><br><sup>1</sup> H, mult. ( <i>J</i> = Hz) |
| Thiazole A               | 2                         | 168.1, C              | -                                                  | -                                                  | -                                                  |
|                          | 4                         | 147.3, C              | -                                                  | -                                                  | -                                                  |
|                          | 5                         | 132.3, CH             | 8.78, s                                            | 8.79, s                                            | 8.79, s                                            |
|                          | CO                        | 161.1, C              | -                                                  | -                                                  | -                                                  |
|                          | COOMe                     | 52.2 CH <sub>3</sub>  | 3.91, s                                            | 3.91, s                                            | -                                                  |
| Pyridine (Py)            | 2                         | 150.1, C              | -                                                  | -                                                  | -                                                  |
|                          | 3                         | 127.6, C              | -                                                  | -                                                  | -                                                  |
|                          | 4                         | 141.3, CH             | 8.41, d (8.2)                                      | 8.43, d (8.1)                                      | 8.43, d (8.2)                                      |
|                          | 5                         | 118.5, CH             | 8.30, d (8.2)                                      | 8.30, d (8.1)                                      | 8.30, d (8.2)                                      |
|                          | 6                         | 150.0, C              | -                                                  | -                                                  | -                                                  |
| Thiazole B               | 2                         | 160.4, C              | -                                                  | -                                                  | -                                                  |
|                          | 4                         | 153.1, C              | -                                                  | -                                                  | -                                                  |
|                          | 5                         | 123.0, CH             | 8.29, s                                            | 8.29, s                                            | 8.29, s                                            |
| Thiazole C               | 2                         | 170.8, C              | -                                                  | -                                                  | -                                                  |
|                          | 4                         | 146.6, C              | -                                                  | -                                                  | -                                                  |
|                          | 5                         | 116.3, CH             | 7.32, s                                            | 7.33, s                                            | 7.34, s                                            |
| Phenylserine<br>(PheSer) | α                         | 58.3, CH              | 5.23, m                                            | 5.20, m                                            | 5.20, m                                            |
|                          | β                         | 73.2, CH              | 5.06, m                                            | 5.04, m                                            | 5.03, m                                            |
|                          | 1                         | 141.6, C              | -                                                  | -                                                  | -                                                  |
|                          | 2,6                       | 126.5, CH             | 7.26 (2H, m)                                       | 7.28 (2H, m)                                       | 7.29, m                                            |
|                          | 3,5                       | 127.7, CH             | 7.25 (2H, m)                                       | 7.27 (2H, m)                                       | 7.28, m                                            |
|                          | 4                         | 127.5, CH             | 7.21, m                                            | 7.22, m                                            | 7.22, m                                            |
|                          | NH                        | -                     | 9.46, d (7.6)                                      | 9.45, d (6.2)                                      | 9.29, d (6.6)                                      |
|                          | OH                        | -                     | 6.70, br s                                         | 6.65, br s                                         | 6.44, br s                                         |
| Glycine<br>(Gly)         | α                         | 41.3, CH <sub>2</sub> | 3.89, dd (17.2,<br>4.0); 4.29, dd<br>(17.2, 8.9)   | 3.81, m; 4.34, m                                   | 3.80, dd (16.7,<br>3.6); 4.31, dd<br>(16.7, 8.6)   |
|                          | CO                        | 169.4, C              | -                                                  | -                                                  | 8.45, m                                            |
|                          | NH                        | -                     | 8.57, m                                            | 8.46, m                                            | -                                                  |
| Thiazole D               | 2                         | 168.3, C              | -                                                  | -                                                  | -                                                  |
|                          | 4                         | 148.4, C              | -                                                  | -                                                  | -                                                  |
|                          | 5                         | 124.5, CH             | 8.28, s                                            | -                                                  | -                                                  |
|                          | 5-CH <sub>2</sub>         | -                     | -                                                  | 4.99, s                                            | 4.98, s                                            |
|                          | 5-<br>CH <sub>2</sub> OMe | -                     | -                                                  | 3.39                                               | 3.39, s                                            |
|                          | CO                        | 161.1, C              | -                                                  | -                                                  | -                                                  |
| Valine (Val)             | α                         | 55.4, CH              | 5.24, m                                            | 5.23, m                                            | 5.24, m                                            |
|                          | β                         | 34.0, CH              | 2.19, m                                            | 2.18, m                                            | 2.18, m                                            |
|                          | γ                         | 18.4, CH <sub>3</sub> | 0.86, d (6.8)                                      | 0.89, d (6.8)                                      | 0.88, d (6.6)                                      |
|                          | γ'                        | 17.8, CH <sub>3</sub> | 0.89, d (6.8)                                      | 0.85, d (6.8)                                      | 0.85, d (6.8)                                      |
|                          | NH                        | -                     | 8.76, d (8.2)                                      | 8.70, d (8.3)                                      | 8.69, br s                                         |
| Thiazole E               | 2                         | 167.9, C              | -                                                  | -                                                  | -                                                  |
|                          | 4                         | 141.7, C              | -                                                  | -                                                  | -                                                  |
|                          | 5                         | 139.6, C              | -                                                  | -                                                  | -                                                  |
|                          | 5-Me                      | 11.8, CH <sub>3</sub> | 2.60, s                                            | 2.59, s                                            | 2.59, s                                            |
|                          | CO                        | 160.5, C              | -                                                  | -                                                  | -                                                  |

|                     |          |                       |                  |                  |                                  |
|---------------------|----------|-----------------------|------------------|------------------|----------------------------------|
| Asparagine<br>(Asn) | $\alpha$ | 47.9, CH              | 5.34, m          | 5.29, m          | 5.30, dd (8.6, 4.6)              |
|                     | $\beta$  | 37.6, CH <sub>2</sub> | 1.43, m; 2.75, m | 1.29, m; 2.72, m | 1.34, m; 2.72, dd<br>(16.0, 3.4) |
|                     | CONHMe   | 169.6, C              | -                | -                | -                                |
|                     | NHMe     | -                     | 7.50, m          | 7.42, m          | 7.41, m                          |
|                     | Me       | 25.7, CH <sub>3</sub> | 2.45, d (4.5)    | 2.46, d (4.6)    | 2.47, d (4.6)                    |
|                     | NH       | -                     | 8.73, d (9.4)    | 8.68, d (8.8)    | 8.67, br s                       |
| Thiazole F          | 2        | 164.6, C              | -                | -                | -                                |
|                     | 4        | 149.3, C              | -                | -                | -                                |
|                     | 5        | 126.9, CH             | 8.61, s          | 8.61, s          | 8.61, br s                       |
|                     | CO       | 160.2                 | -                | -                | -                                |

<sup>1</sup>H (400 MHz) and <sup>13</sup>C (100 MHz) in DMSO-*d*<sub>6</sub>. Assignments based on COSY, HSQC and HMBC and comparison with literature compounds. Chemical shifts ( $\delta$ ) in ppm. s: singlet; br s: broad singlet; d: doublet; br d: broad doublet; t: triplet, m: multiplet. One proton unless otherwise stated.

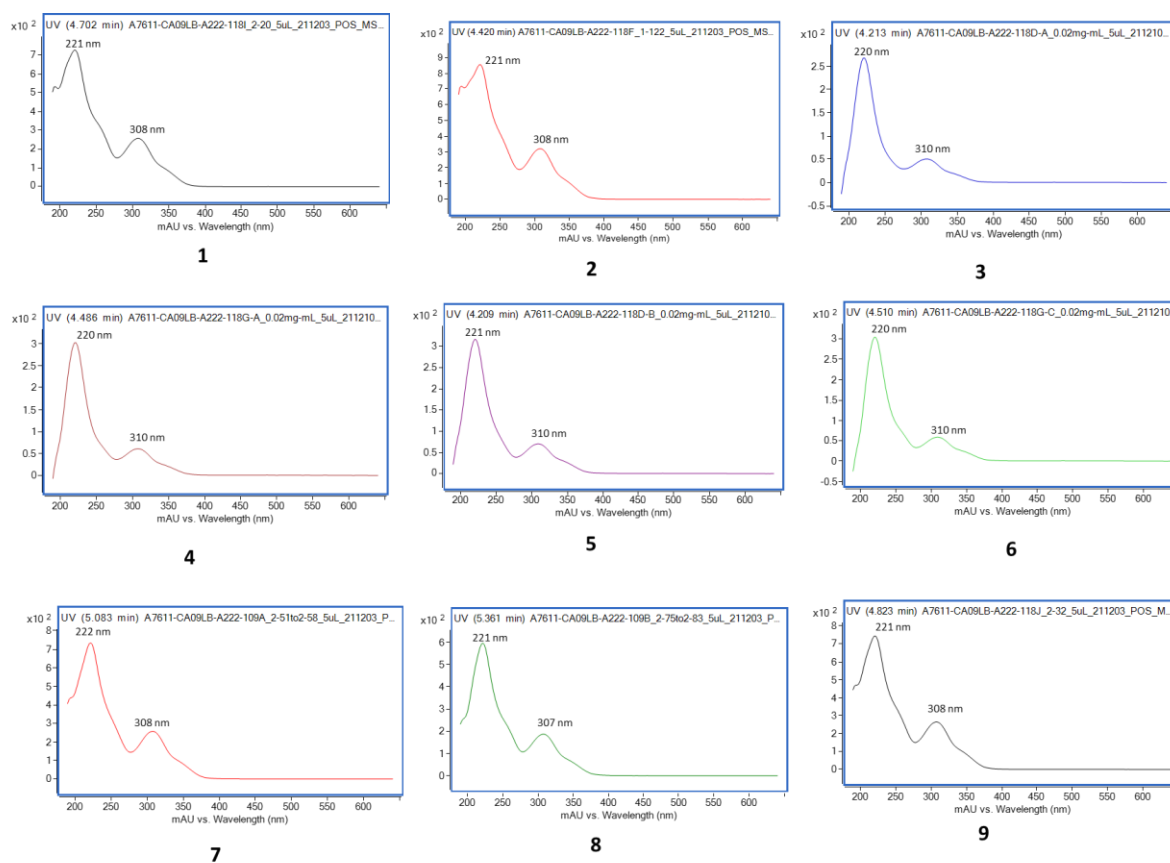

**Figure S1.** UV spectra for compounds **1–9**.



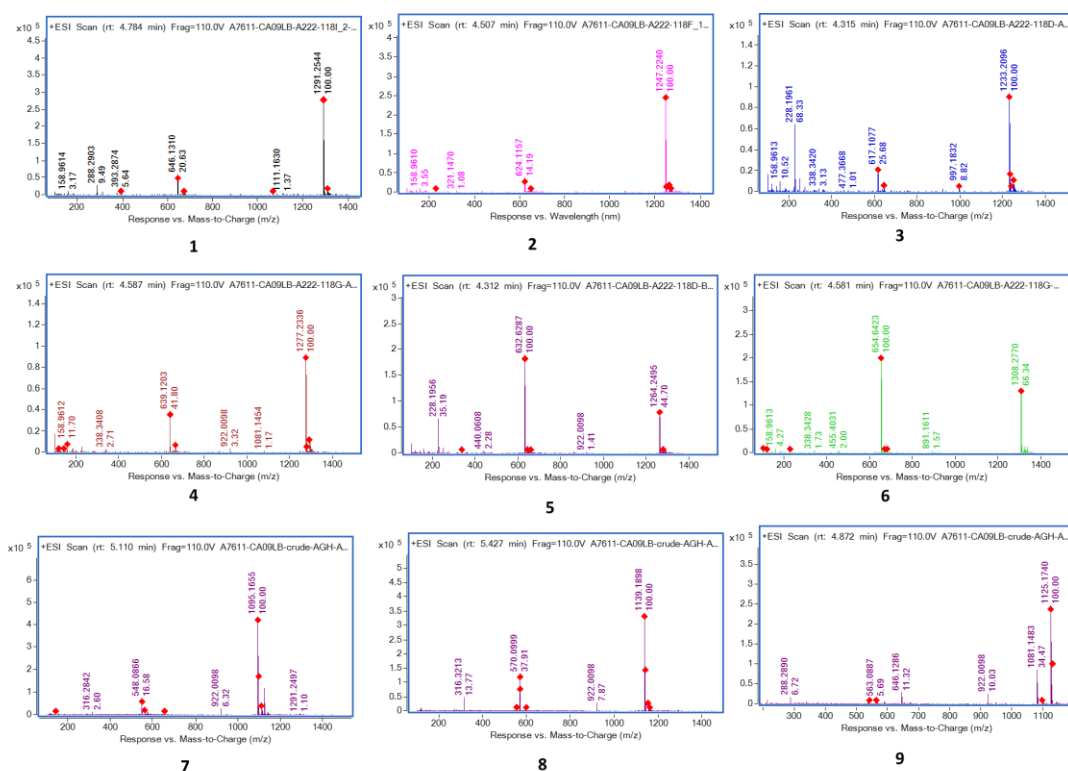

**Figure S2.** (+)-HRESIMS spectra for compounds **1–9**.

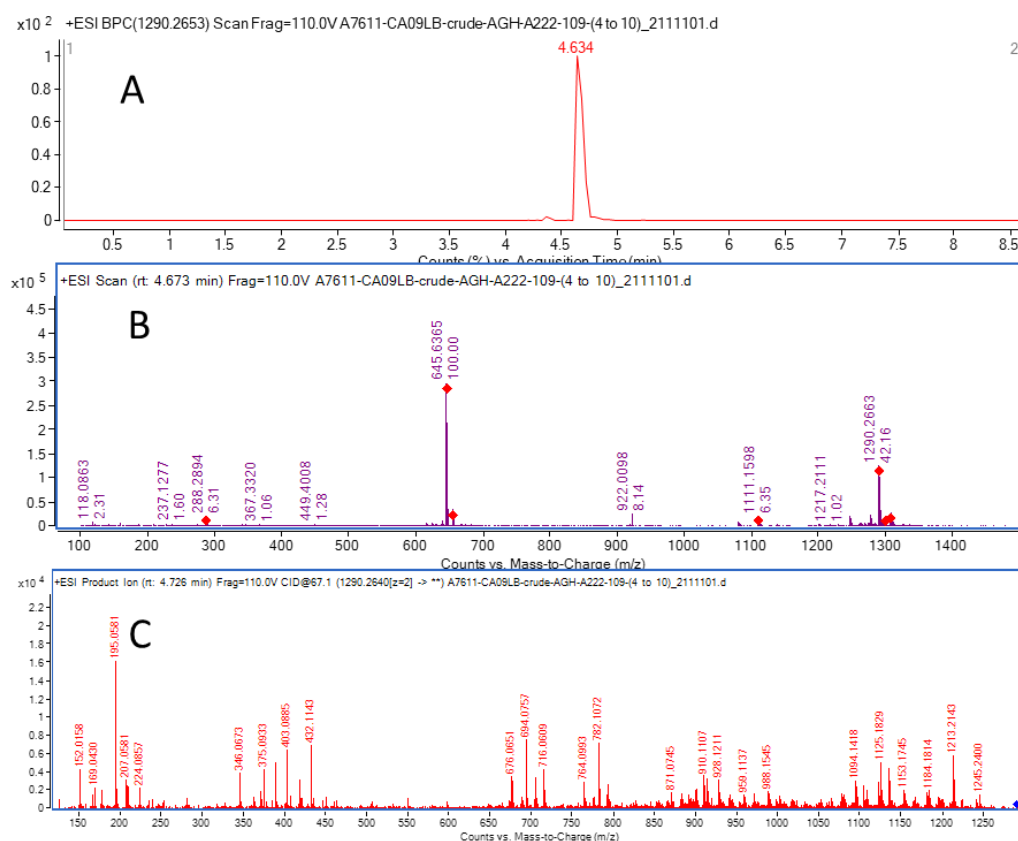

**Figure S3.** **A.** Extracted ion chromatogram ( $m/z$  1290.2653  $\pm$  5 ppm), **B.** (+)-HRESIMS spectrum, and **C.** MS/MS spectrum of GE2270A in the extract of *Nonomuraea jiangxiensis* strain A7611.

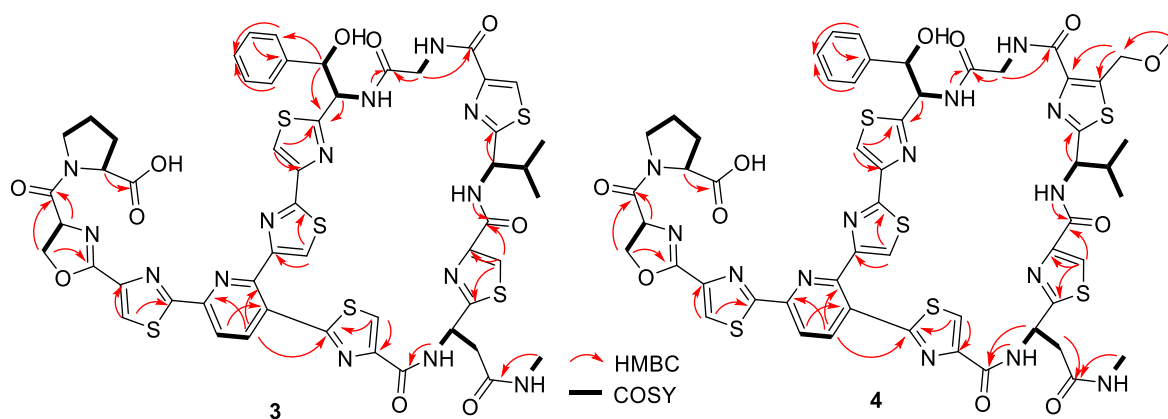

**Figure S4.** Selected COSY and HMBC correlations of **3** and **4**.

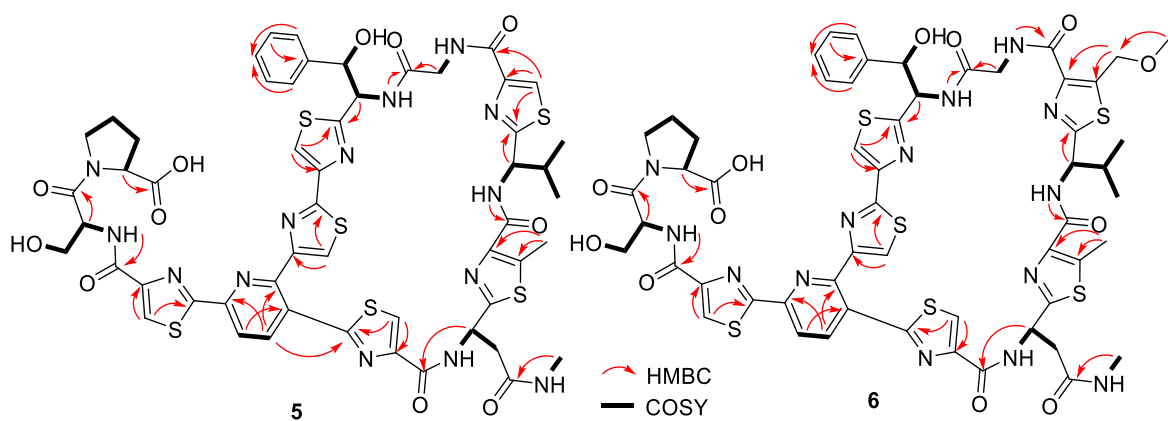

**Figure S5.** Selected COSY and HMBC correlations of **5** and **6**.

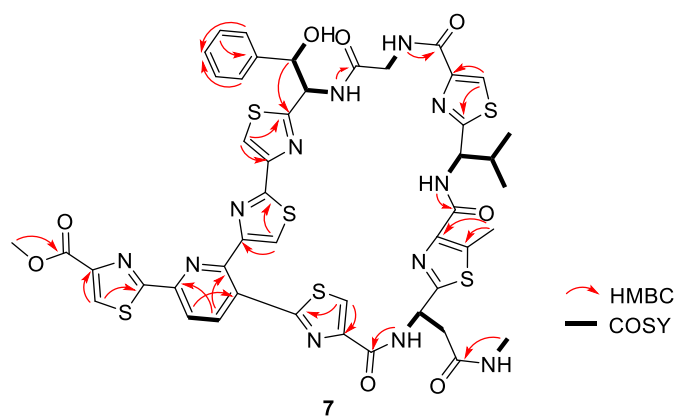

**Figure S6.** Selected COSY and HMBC correlations of **7**.

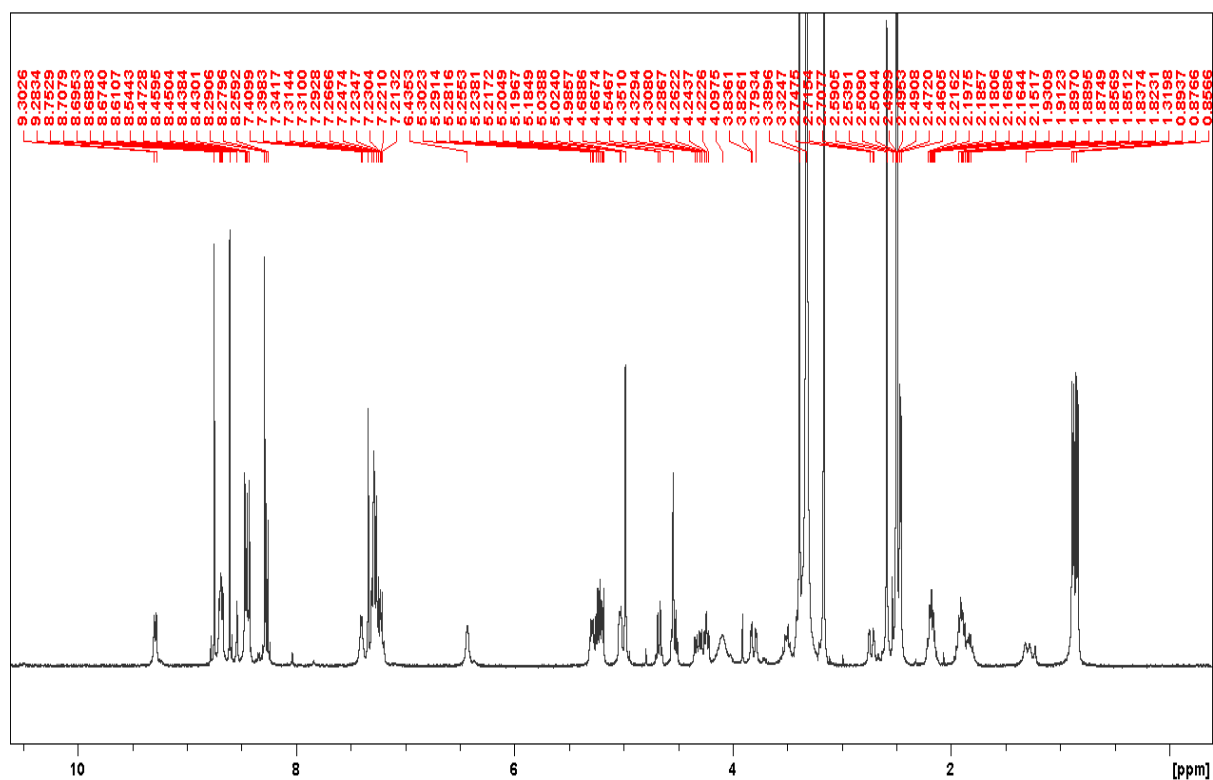

**Figure S7.** <sup>1</sup>H NMR spectrum (DMSO-*d*<sub>6</sub>, 400 MHz) of **1**.

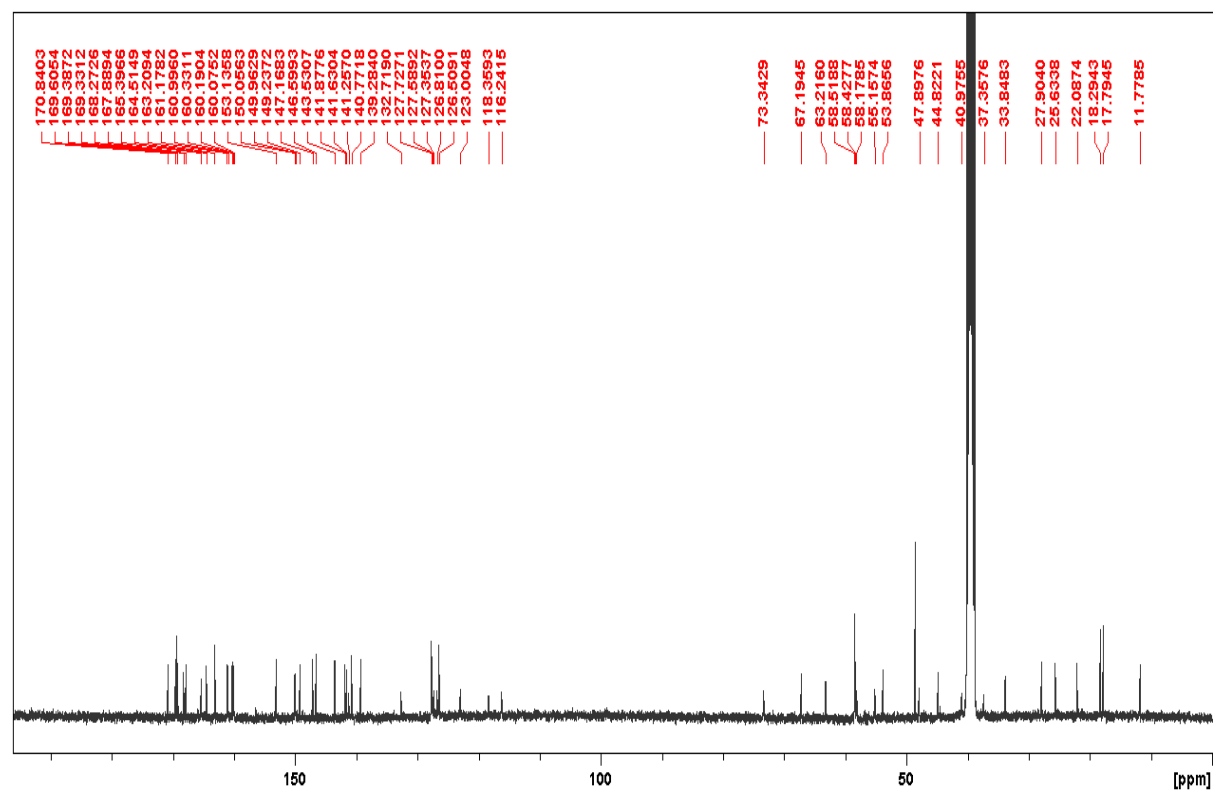

**Figure S8.** <sup>13</sup>C NMR spectrum (DMSO-*d*<sub>6</sub>, 100 MHz) of **1**.

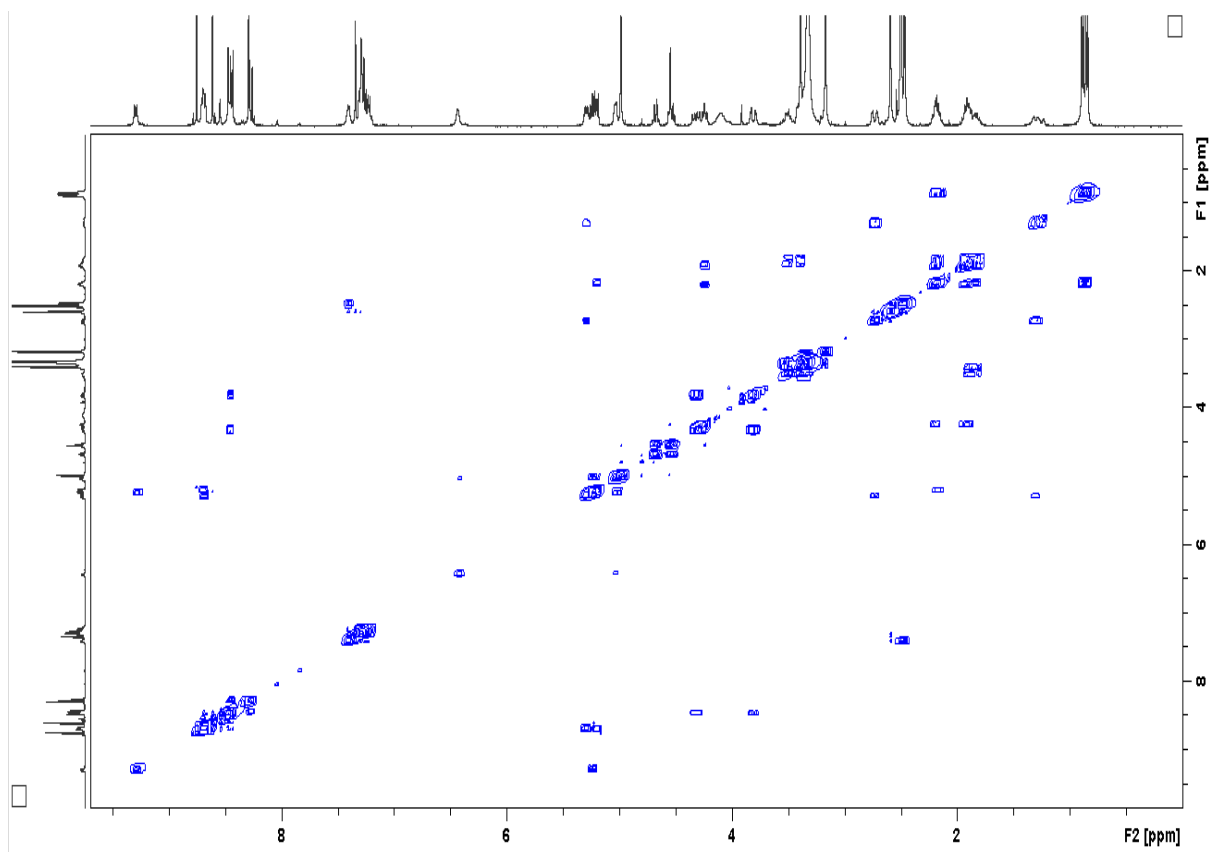

**Figure S9.** COSY spectrum of **1**.

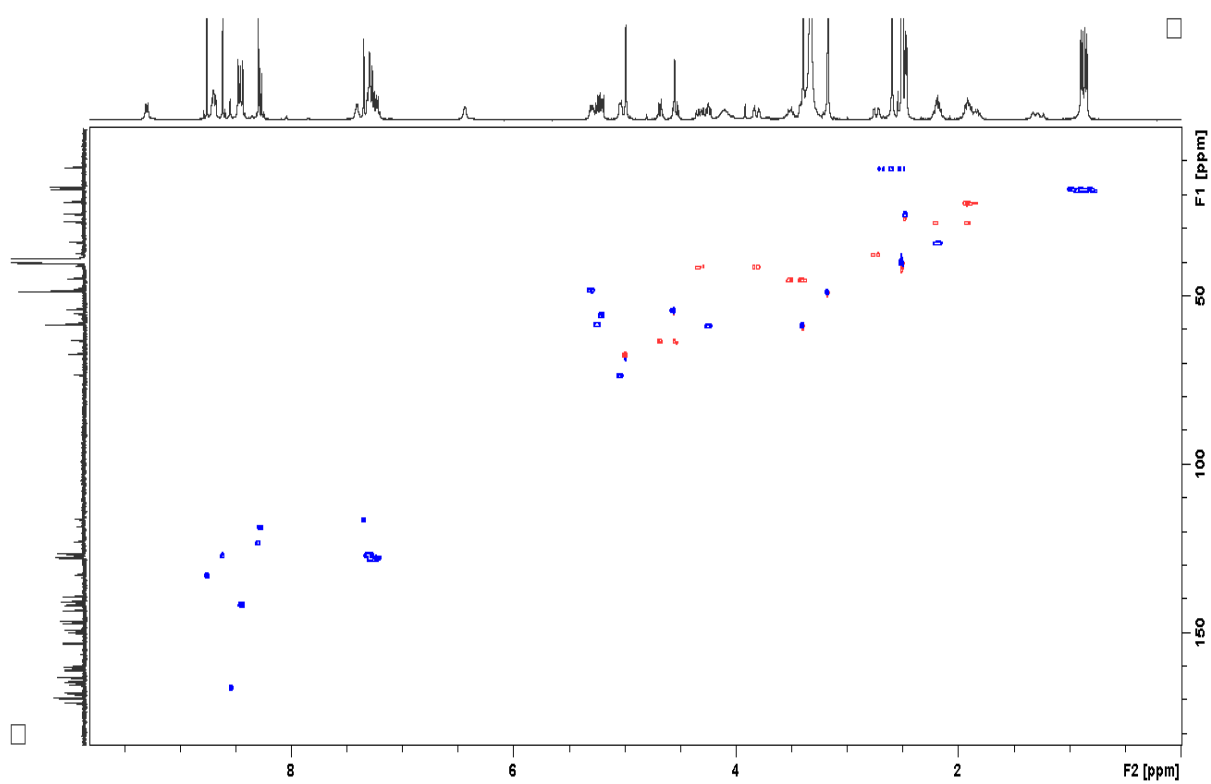

**Figure S10.** HSQC spectrum of **1**.

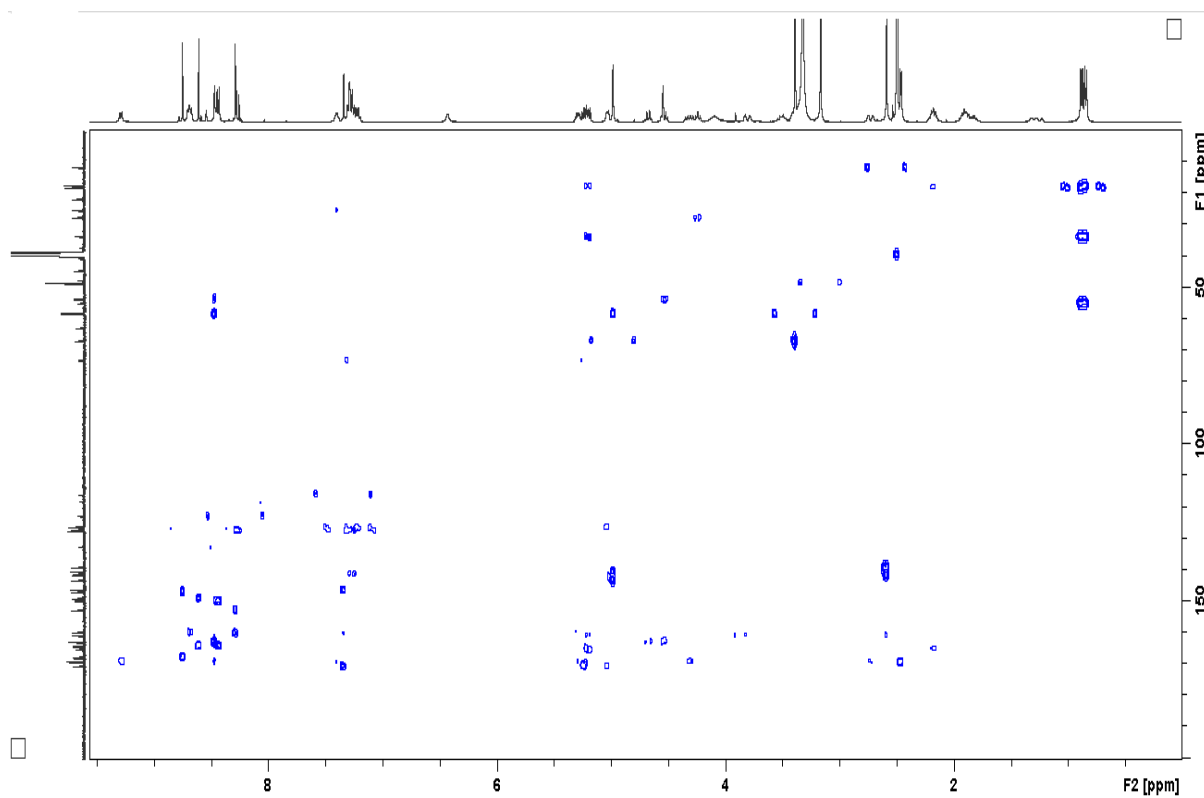

**Figure S11.** HMBC spectrum of **1**.

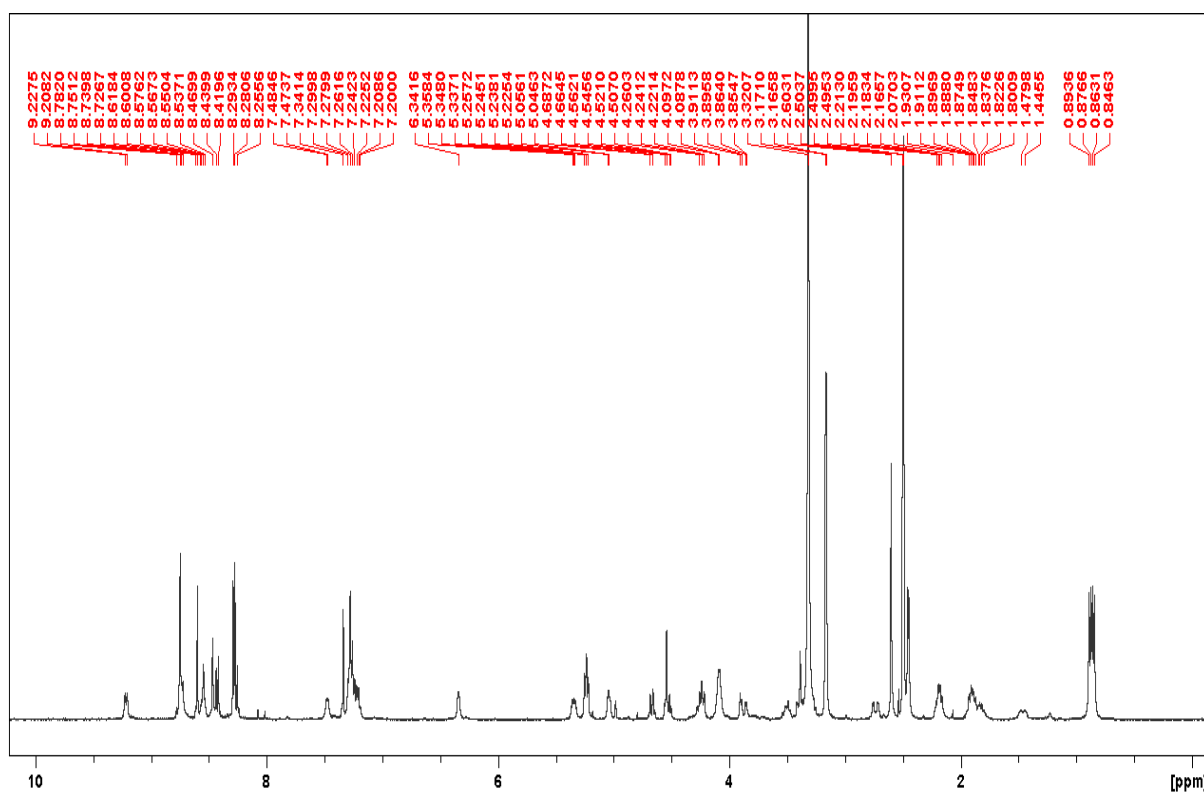

**Figure S12.**  $^1\text{H}$  NMR spectrum ( $\text{DMSO-}d_6$ , 400 MHz) of **2**.

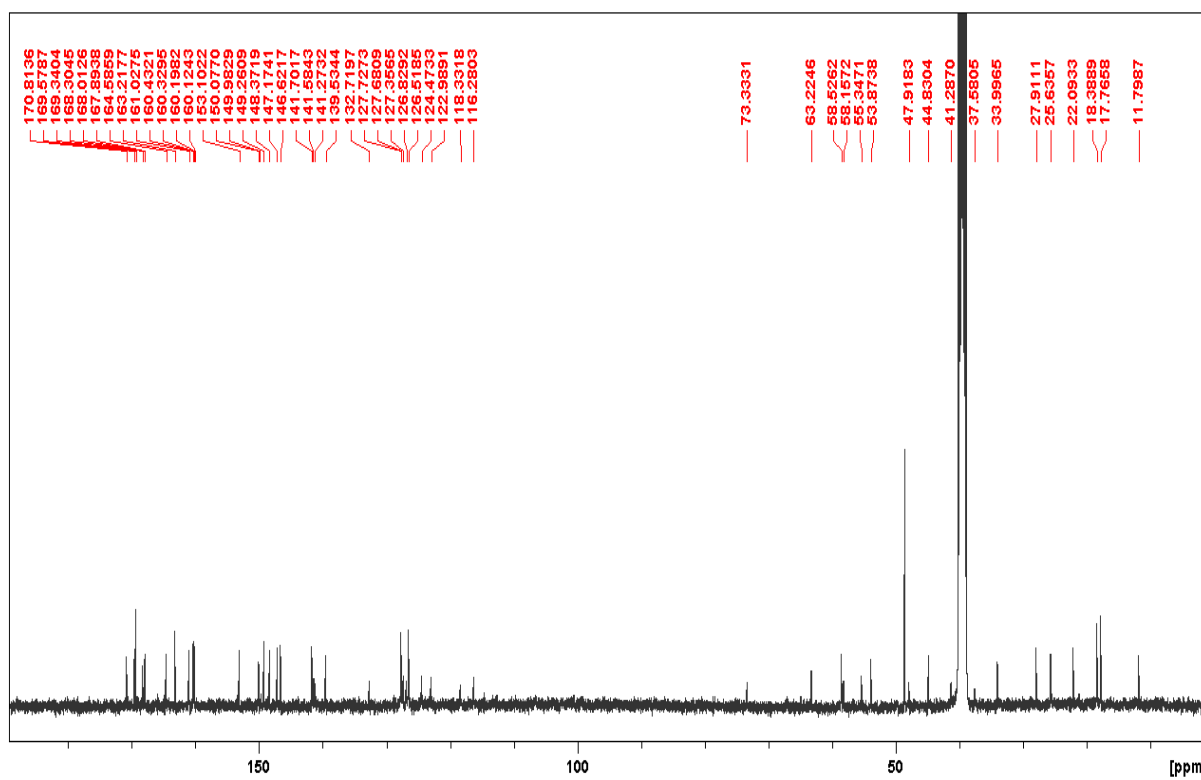

**Figure S13.**  $^{13}\text{C}$  NMR spectrum ( $\text{DMSO-}d_6$ , 100 MHz) of **2**.

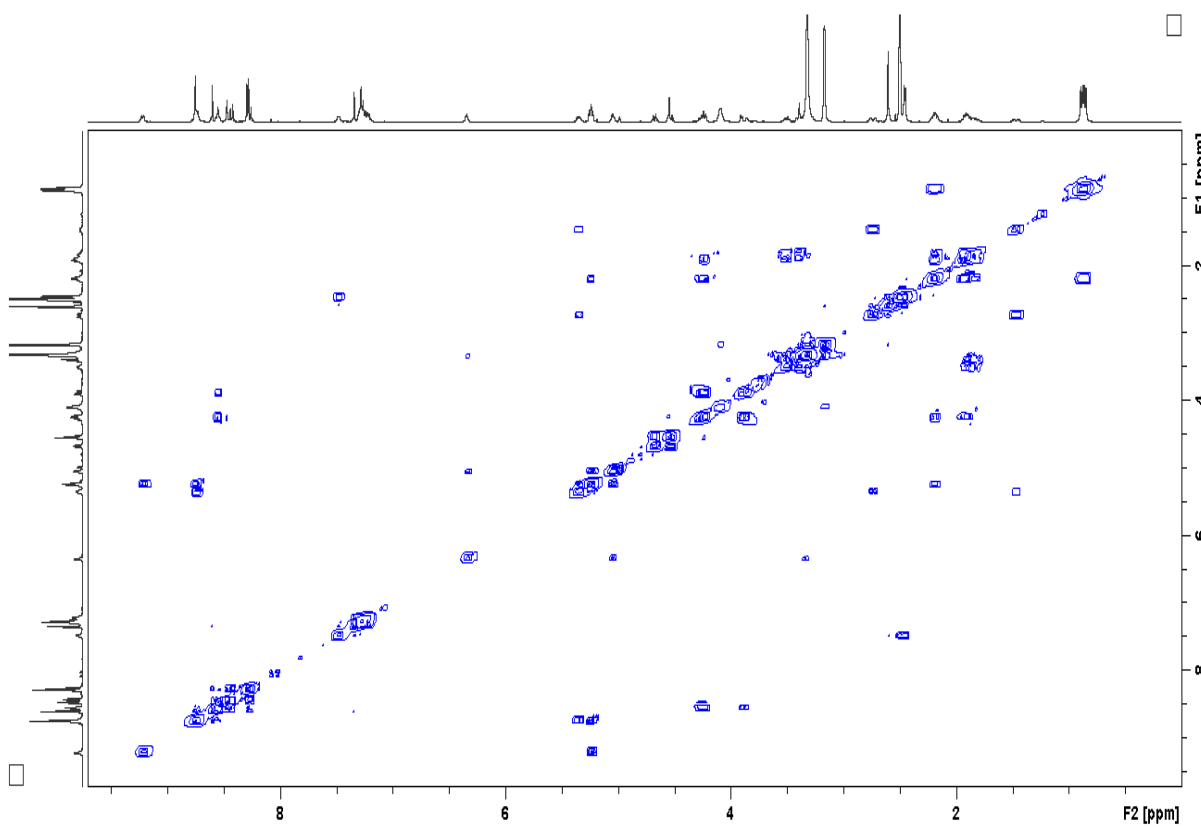

**Figure S14.** COSY spectrum of **2**.

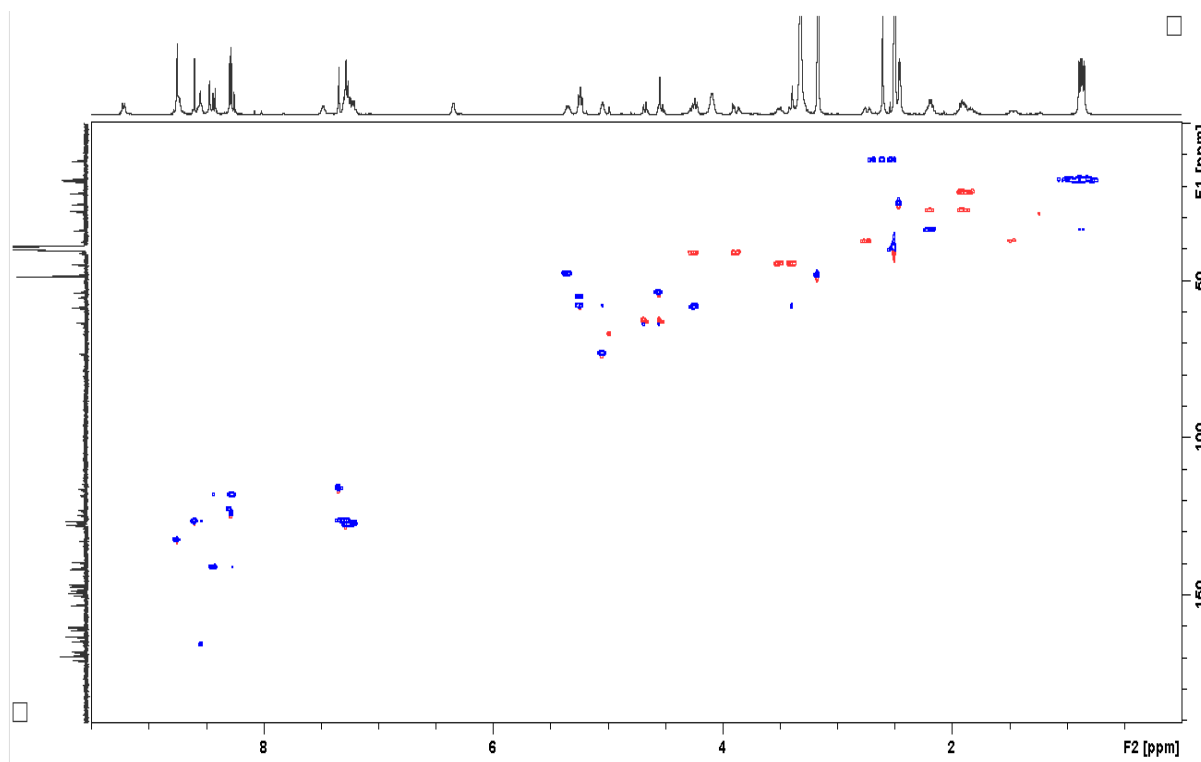

**Figure S15.** HSQC spectrum of **2**.

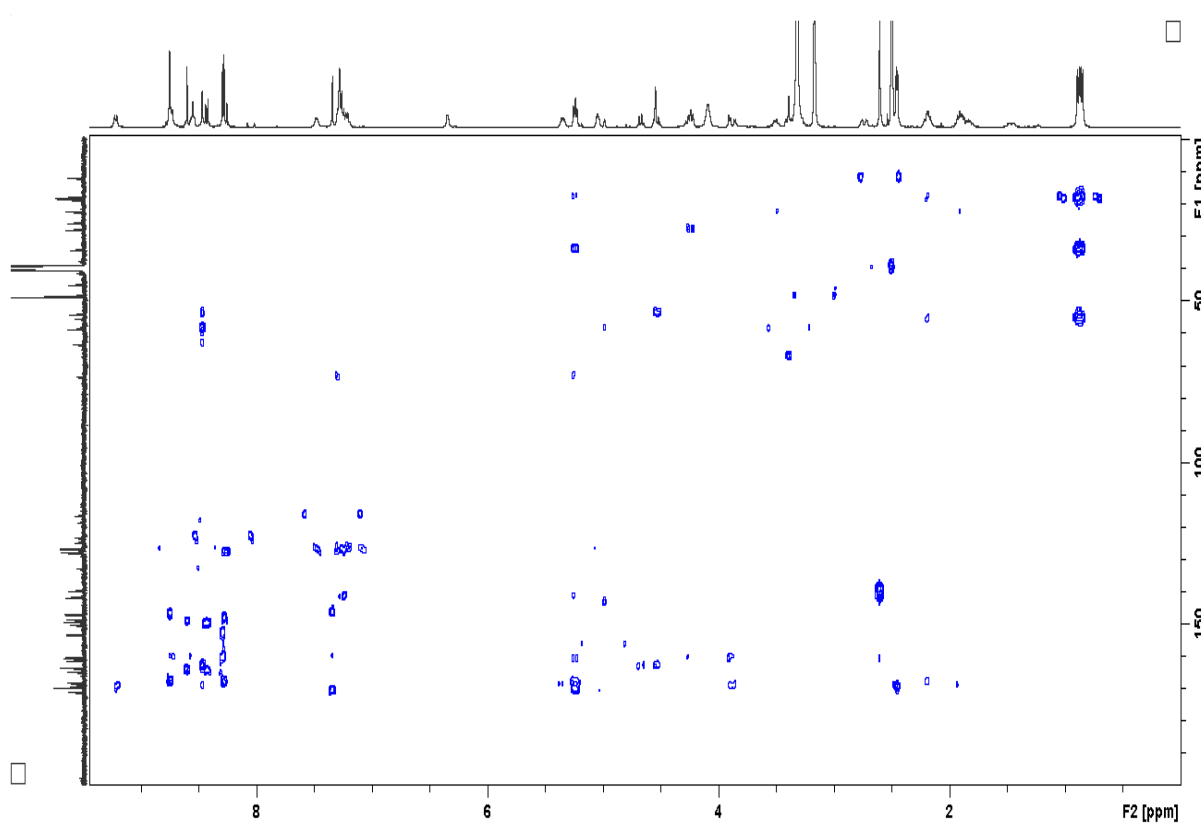

**Figure S16.** HMBC spectrum of **2**.





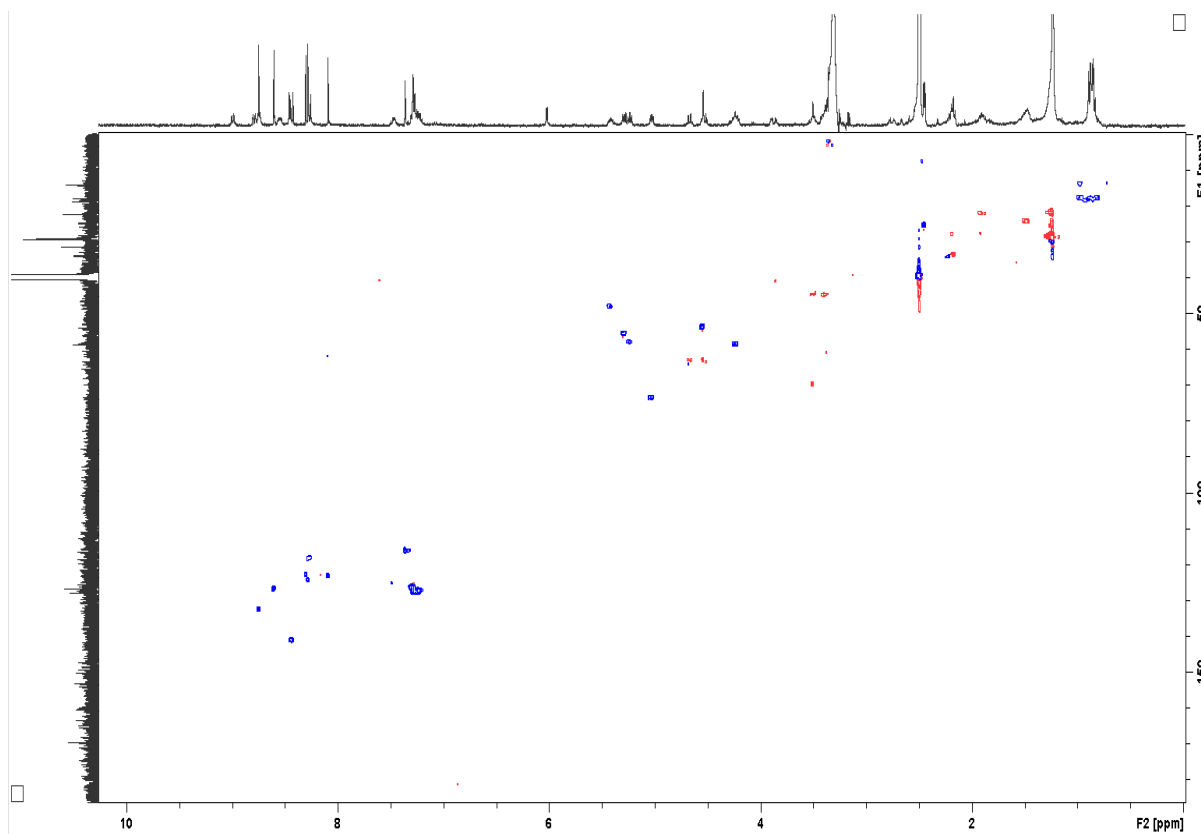

**Figure S19.** HSQC spectrum of **3**.

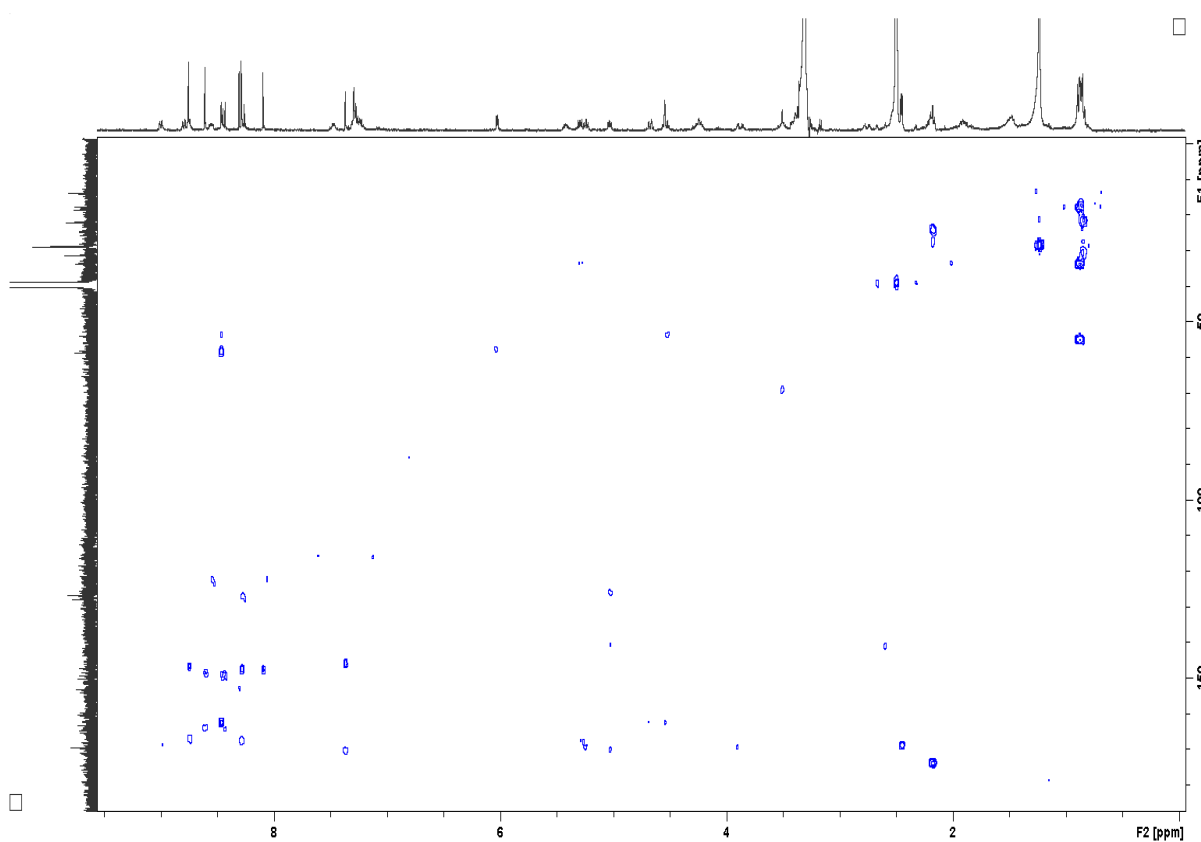

**Figure S20.** HMBC spectrum of **3**.

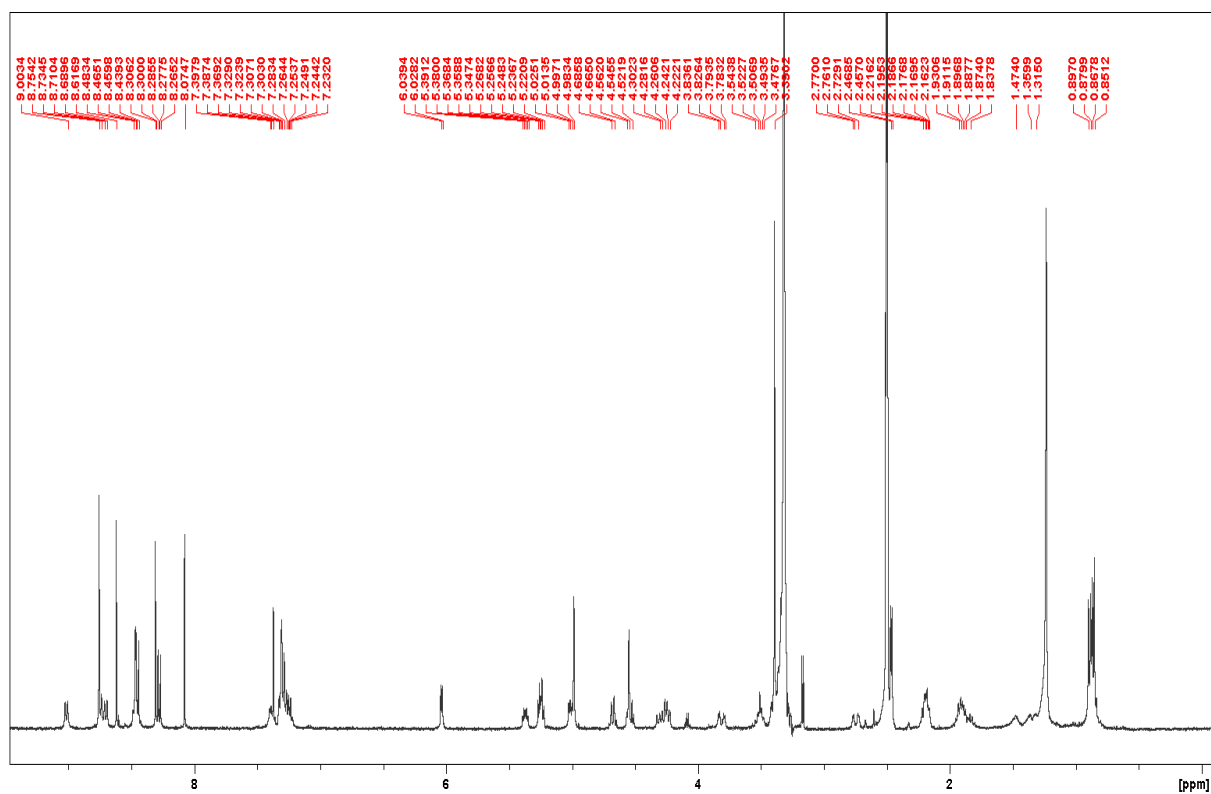

**Figure S21.** <sup>1</sup>H NMR spectrum (DMSO-*d*<sub>6</sub>, 400 MHz) of **4**.

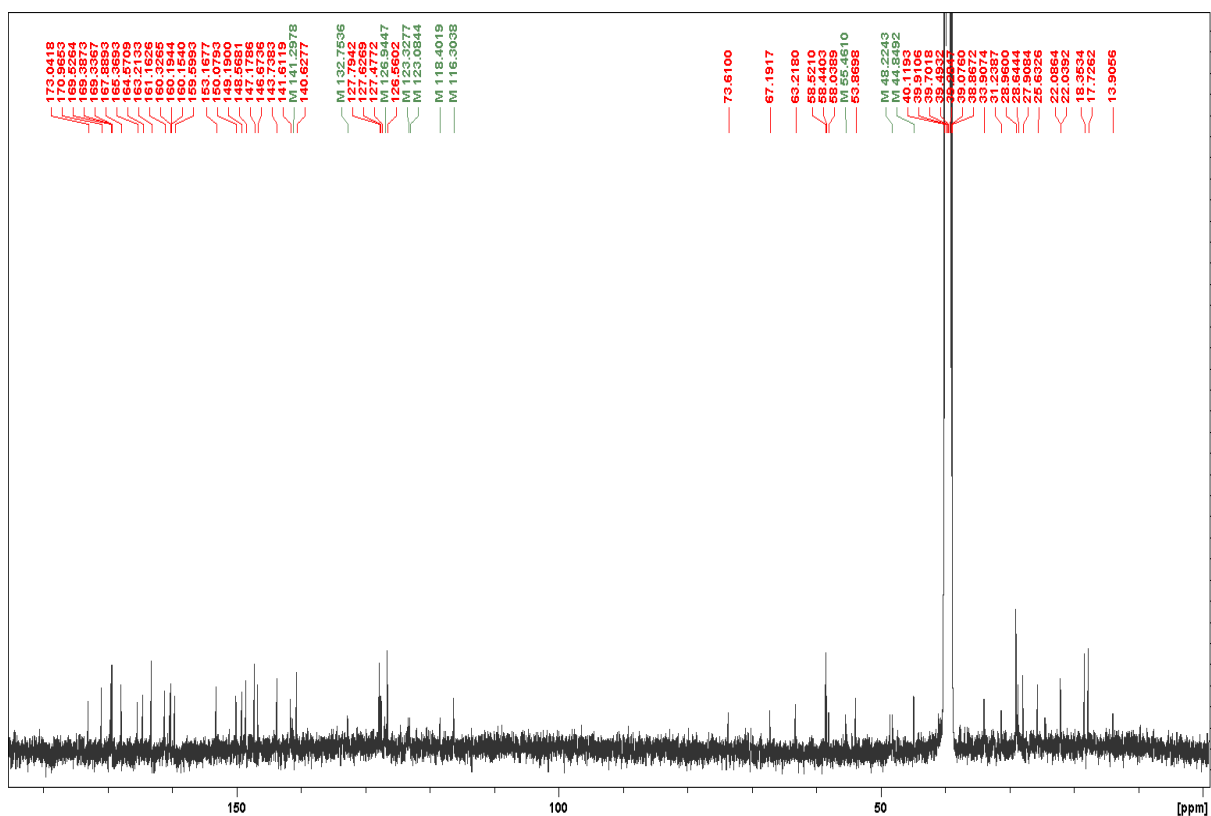

**Figure S22.** <sup>13</sup>C NMR spectrum (DMSO-*d*<sub>6</sub>, 100 MHz) of **4**.

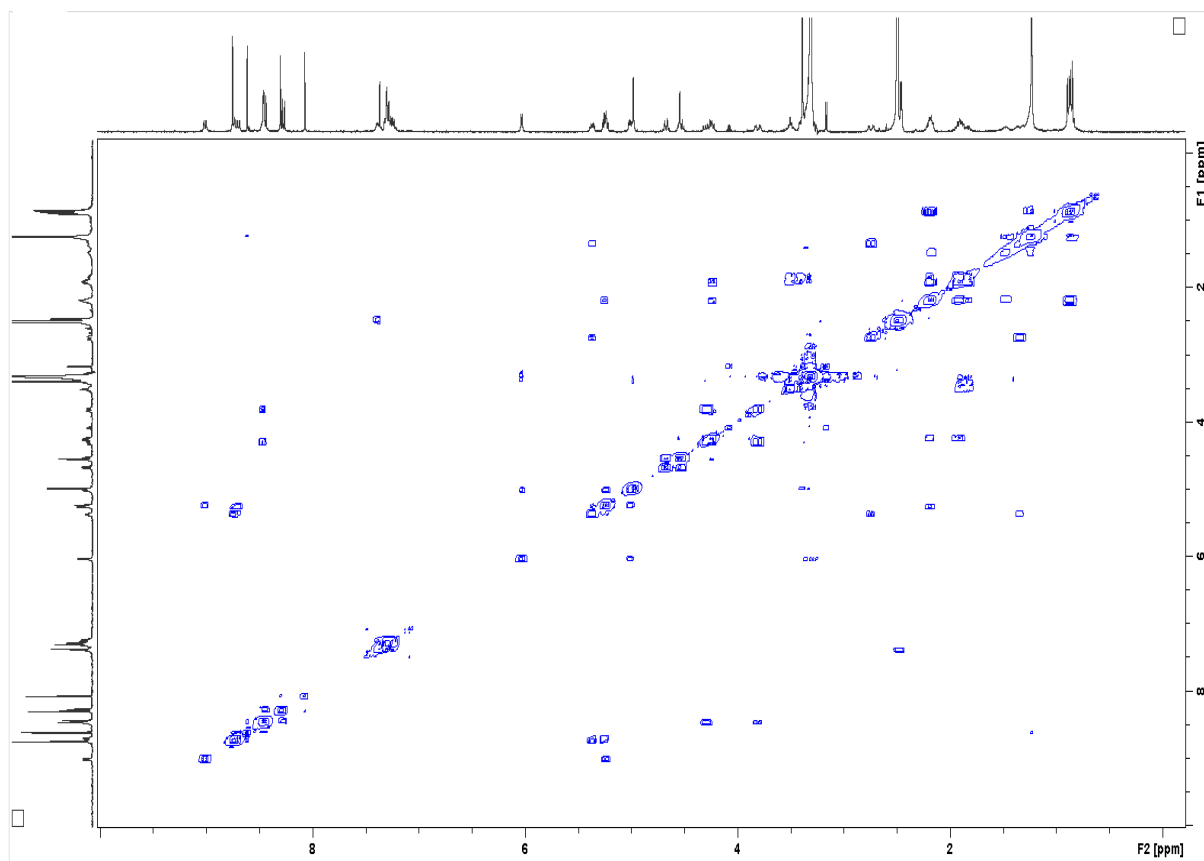

**Figure S23.** COSY spectrum of **4**.

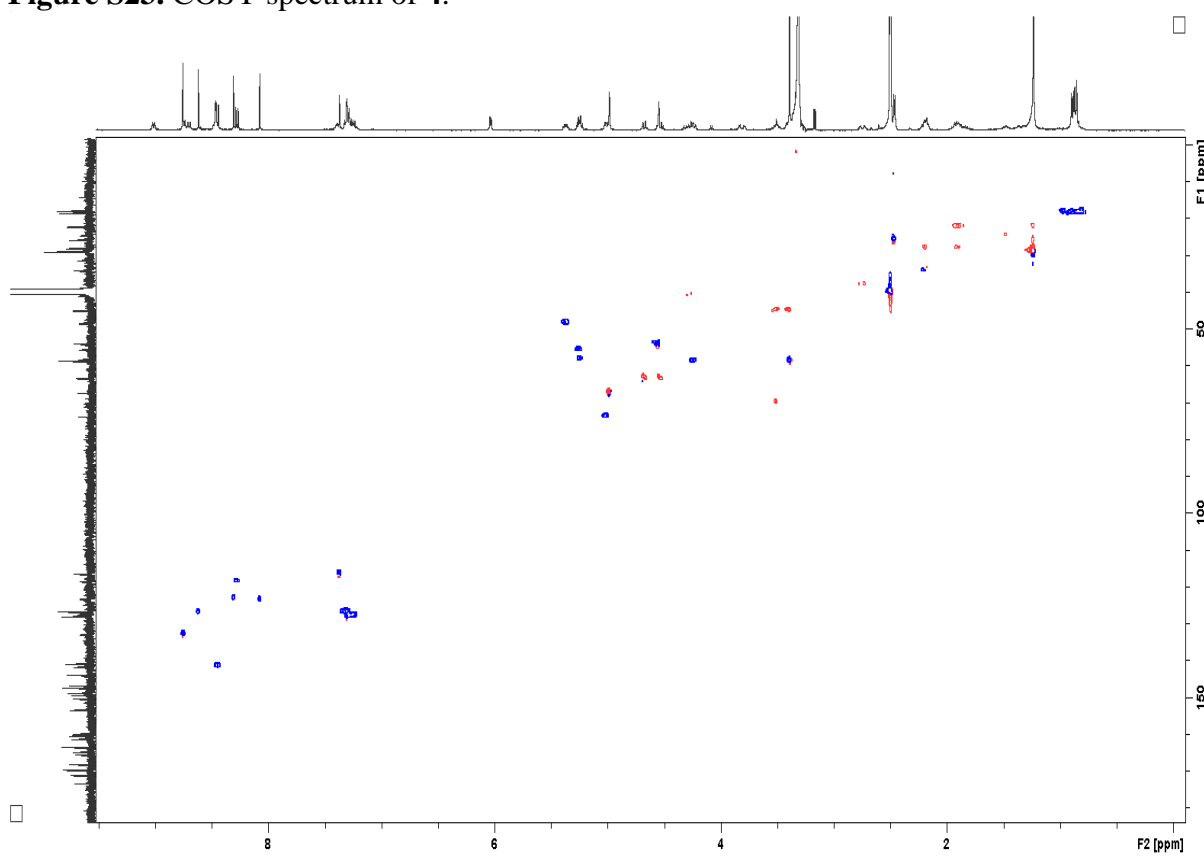

**Figure S24.** HSQC spectrum of **4**.

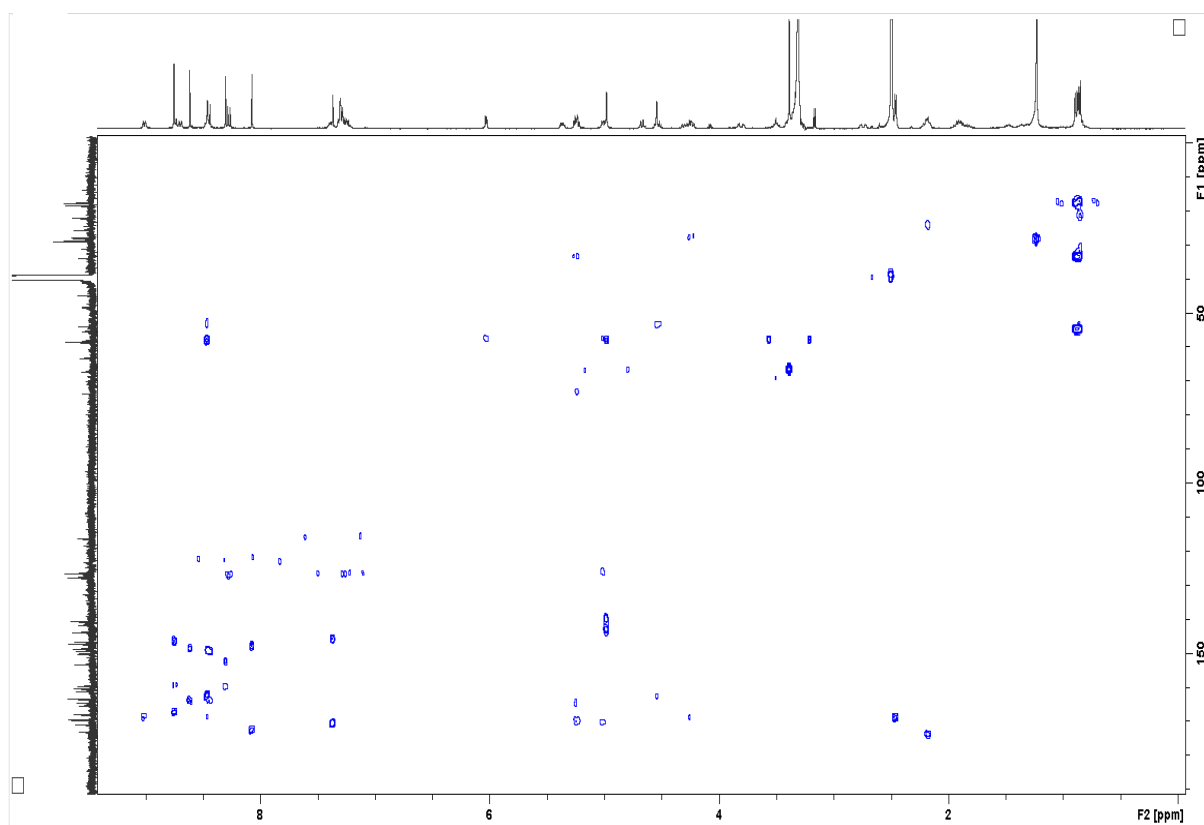

**Figure S25.** HMBC spectrum of **4**.

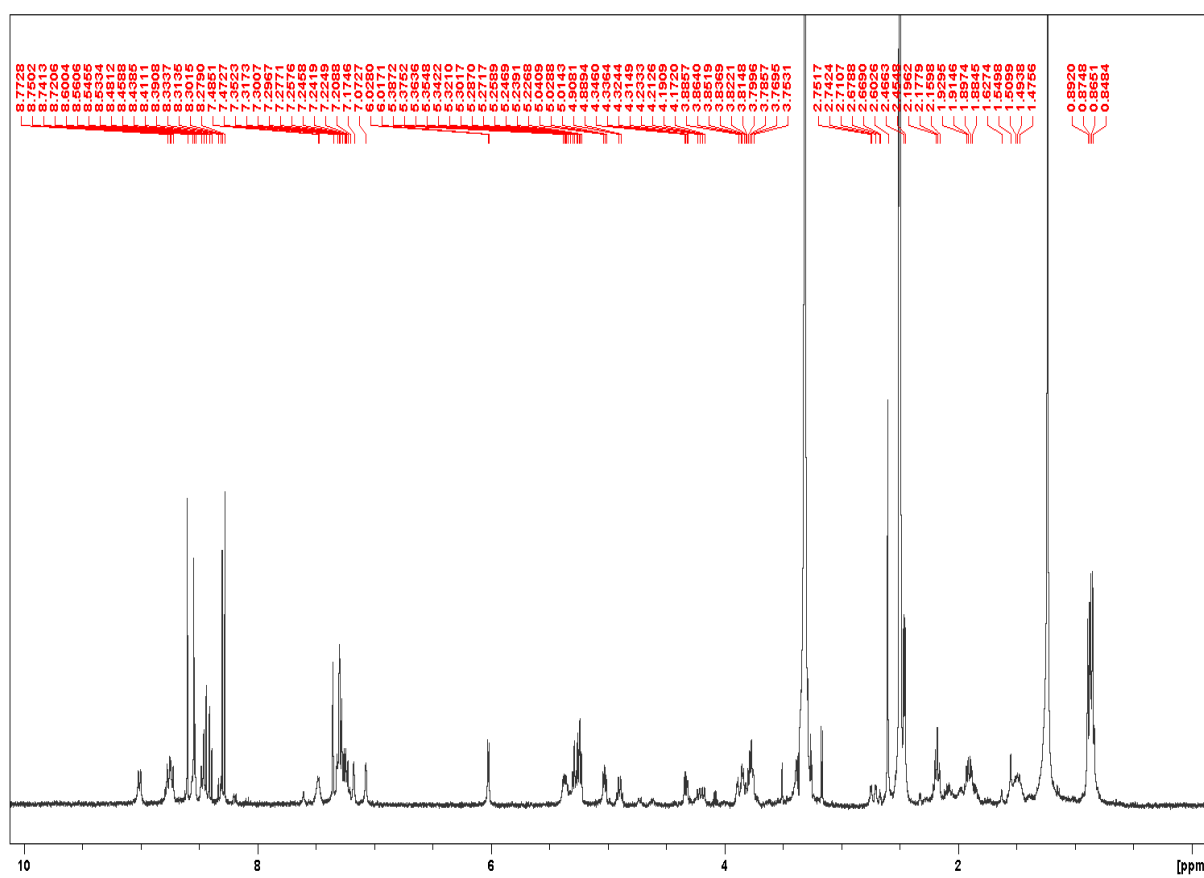

**Figure S26.**  $^1\text{H}$  NMR spectrum ( $\text{DMSO-}d_6$ , 400 MHz) of **5**.

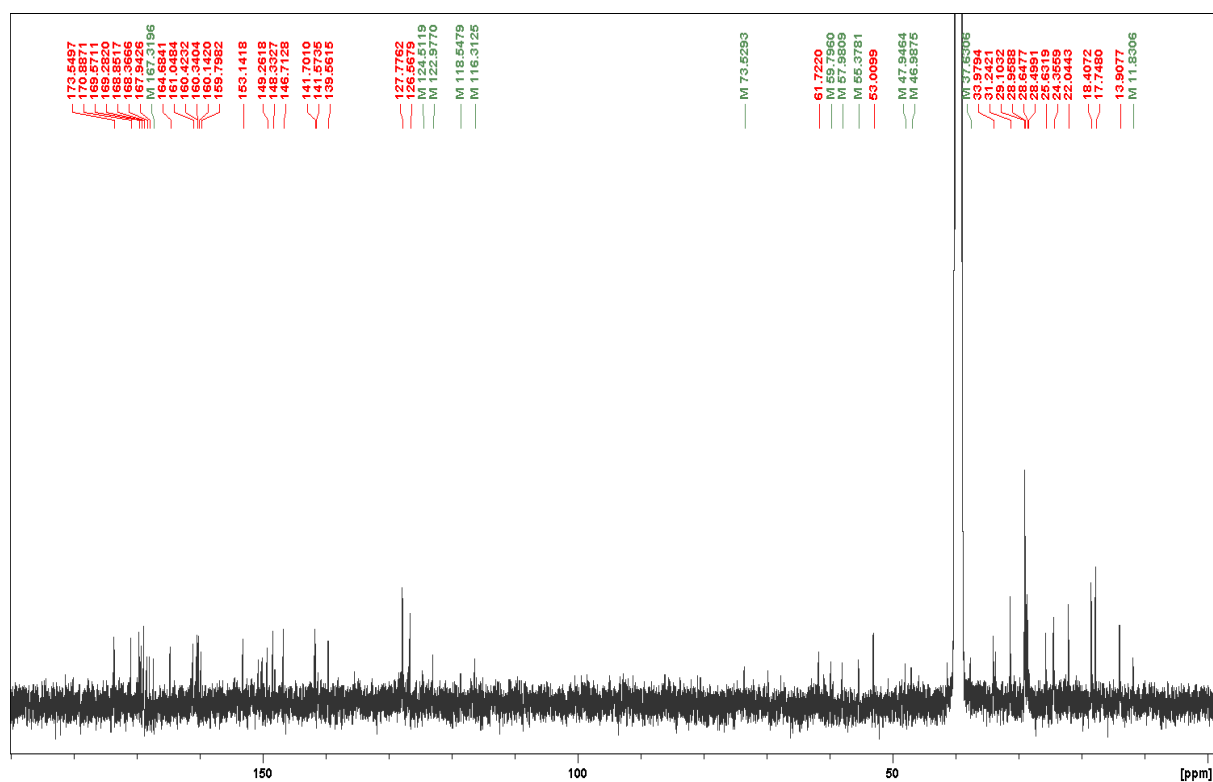

**Figure S27.**  $^{13}\text{C}$  NMR spectrum ( $\text{DMSO-}d_6$ , 100 MHz) of **5**.

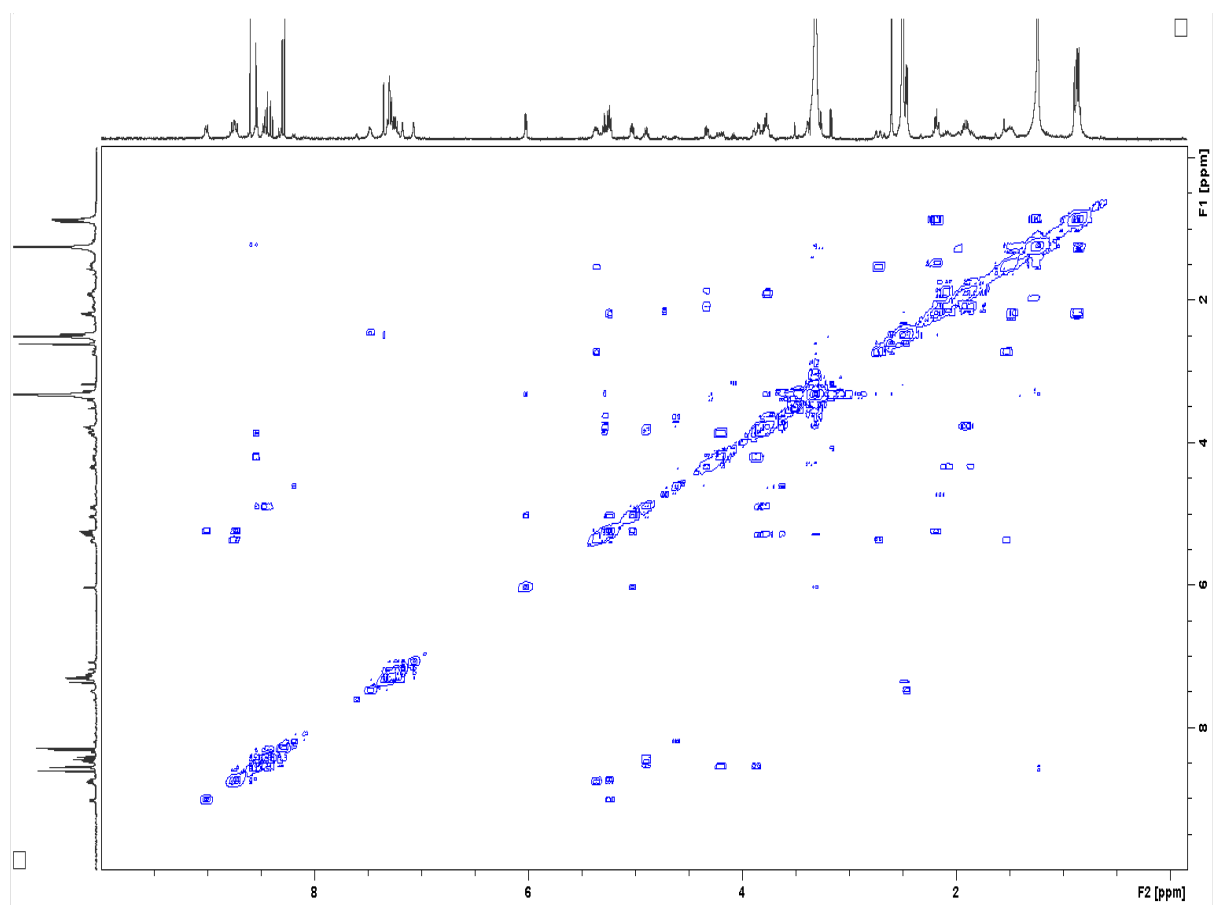

**Figure S28.** COSY spectrum of **5**.

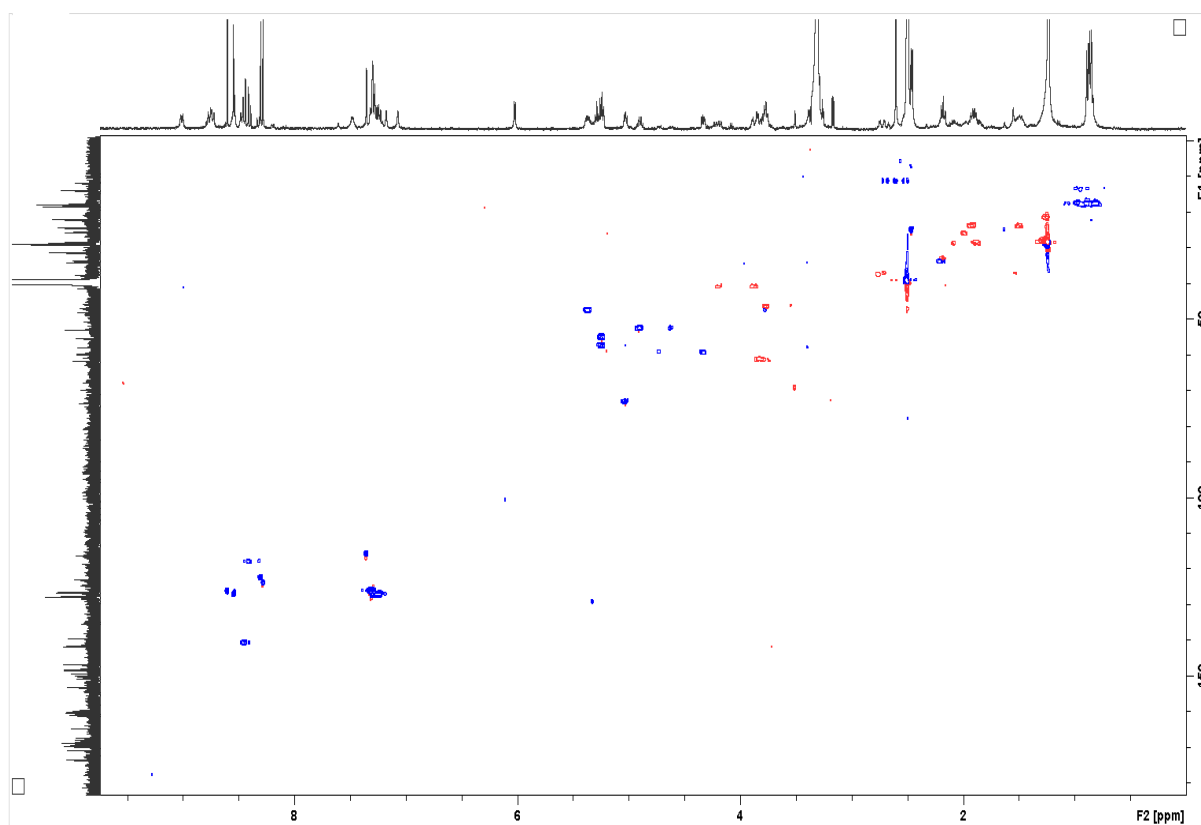

**Figure S29.** HSQC spectrum of **5**.

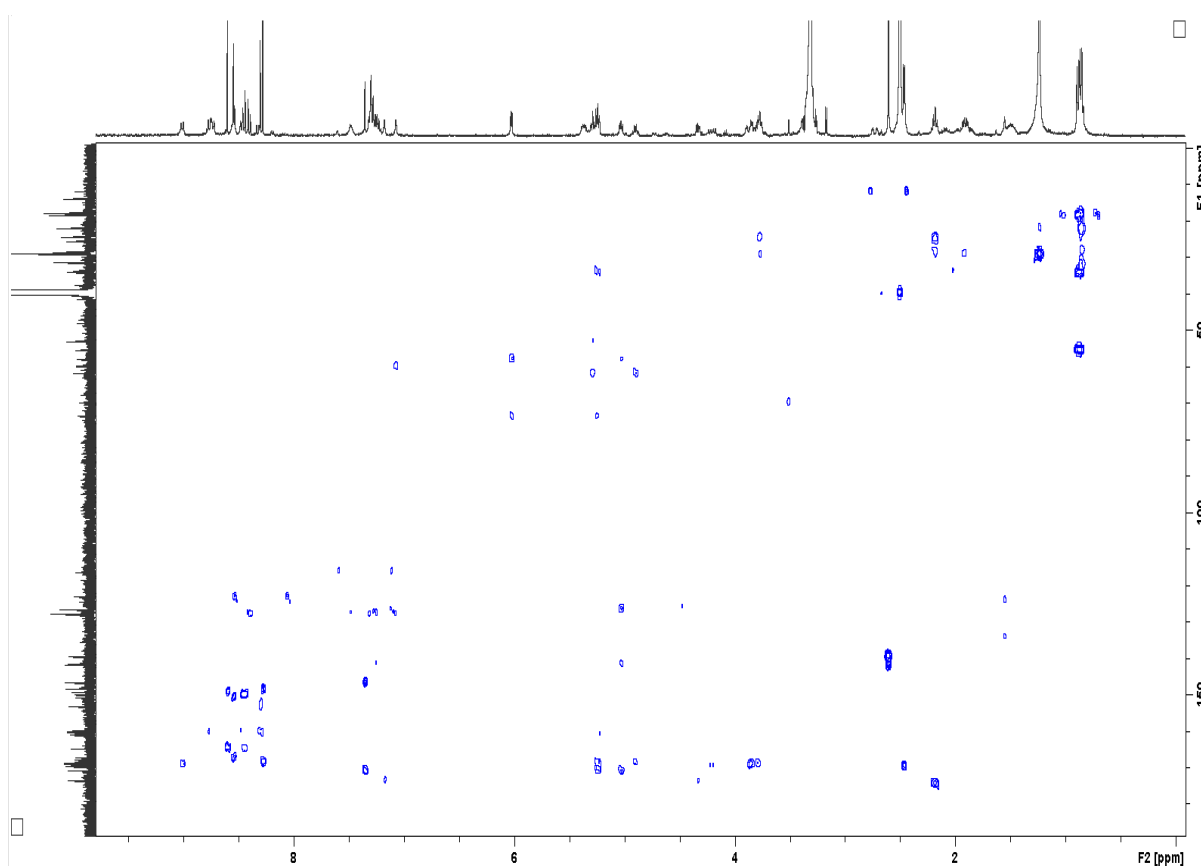

**Figure S30.** HMBC spectrum of **5**.

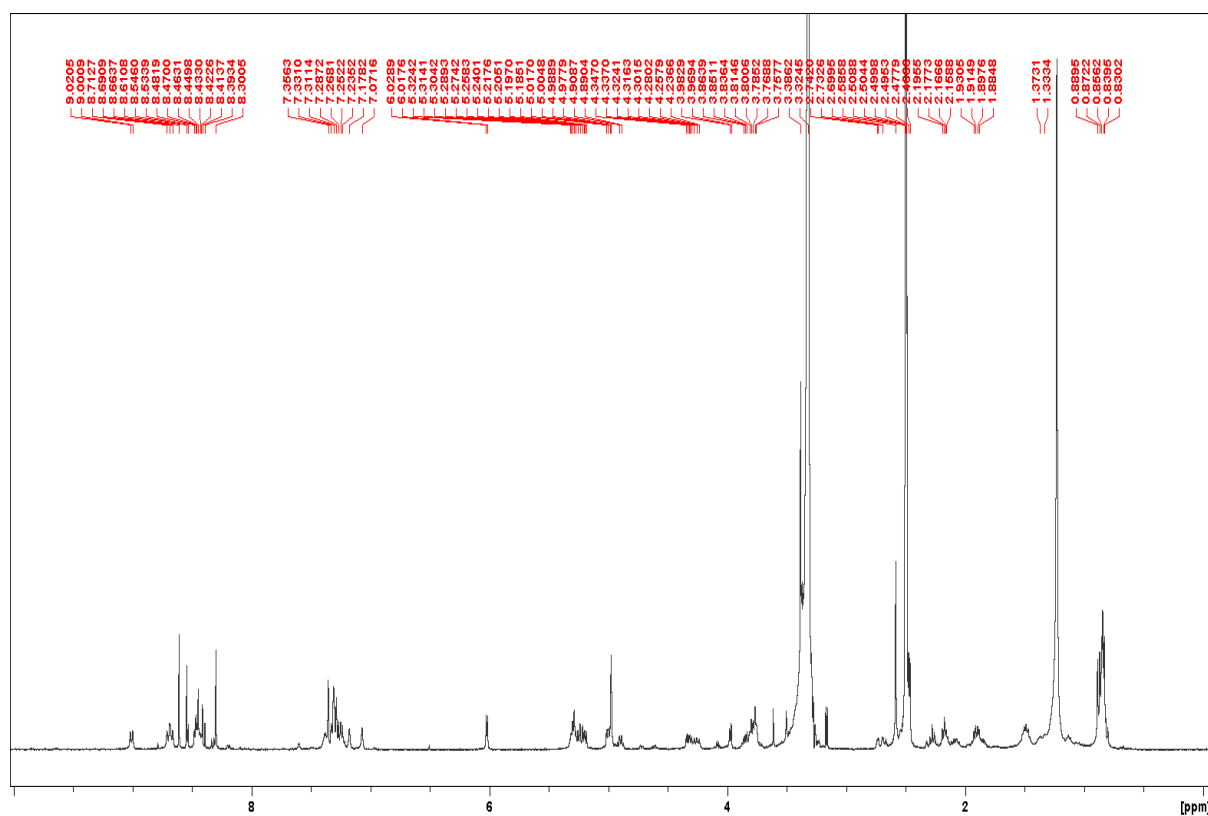

**Figure S31.** <sup>1</sup>H NMR spectrum (DMSO-*d*<sub>6</sub>, 400 MHz) of **6**.

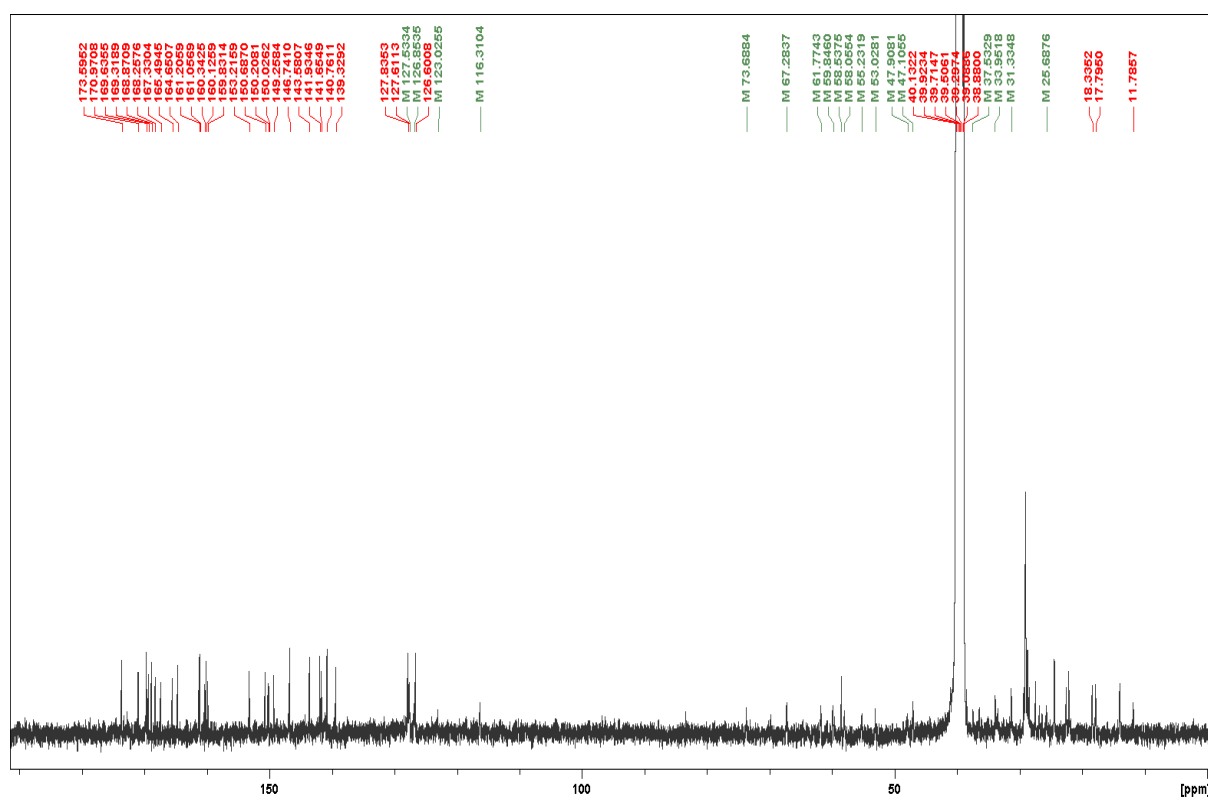

**Figure S32.** <sup>13</sup>C NMR spectrum (DMSO-*d*<sub>6</sub>, 100 MHz) of **6**.

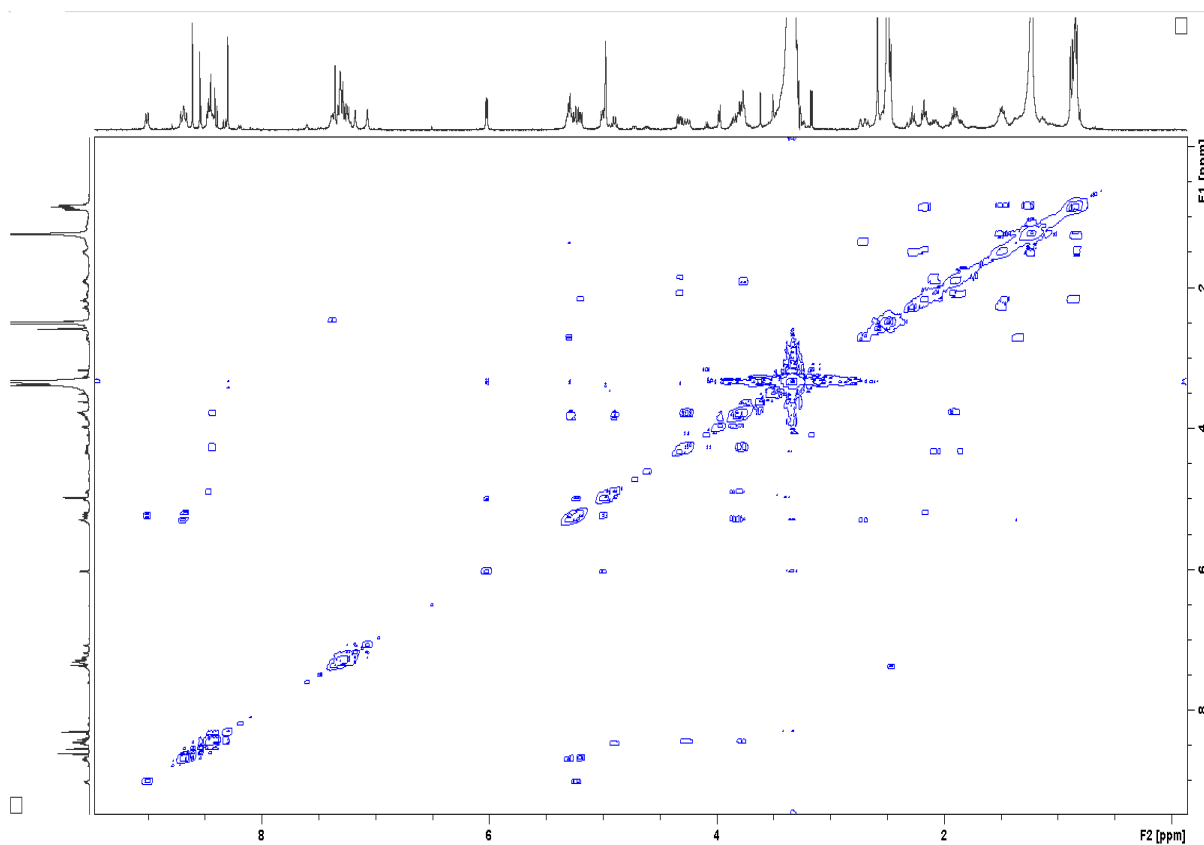

**Figure S33.** COSY spectrum of **6**.

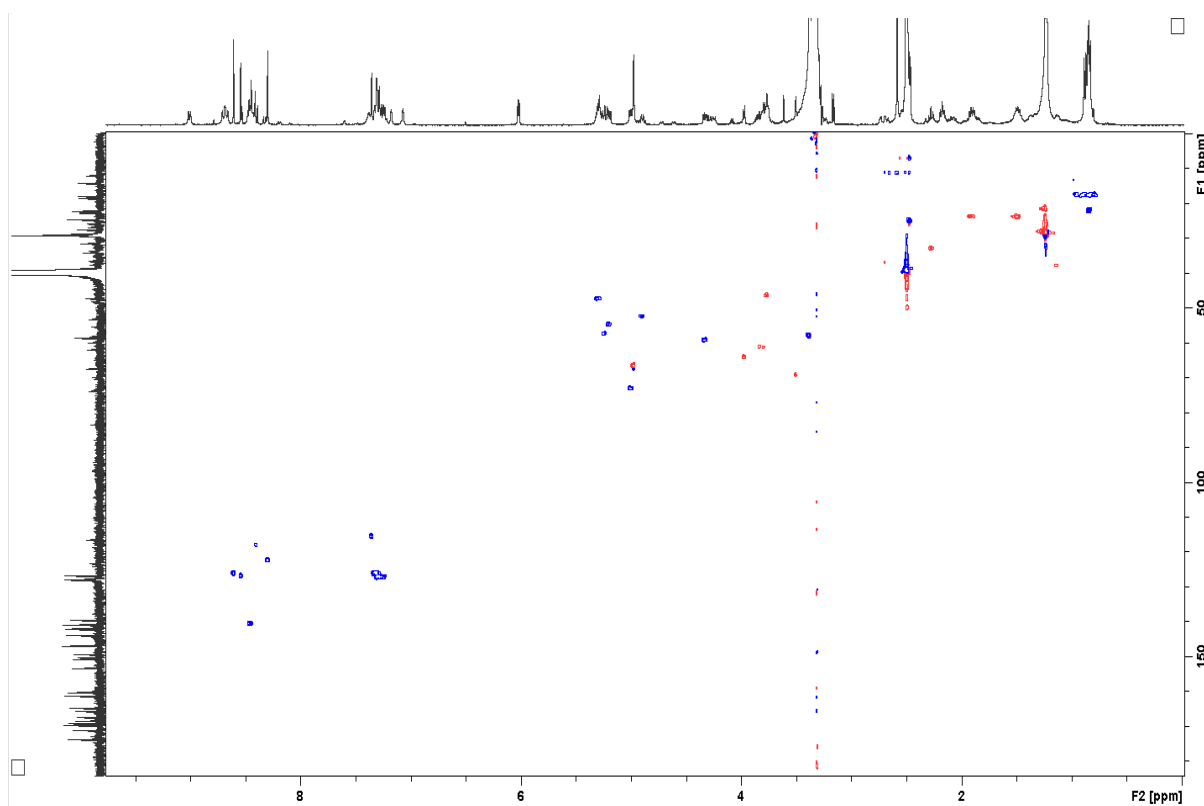

**Figure S34.** HSQC spectrum of **6**.



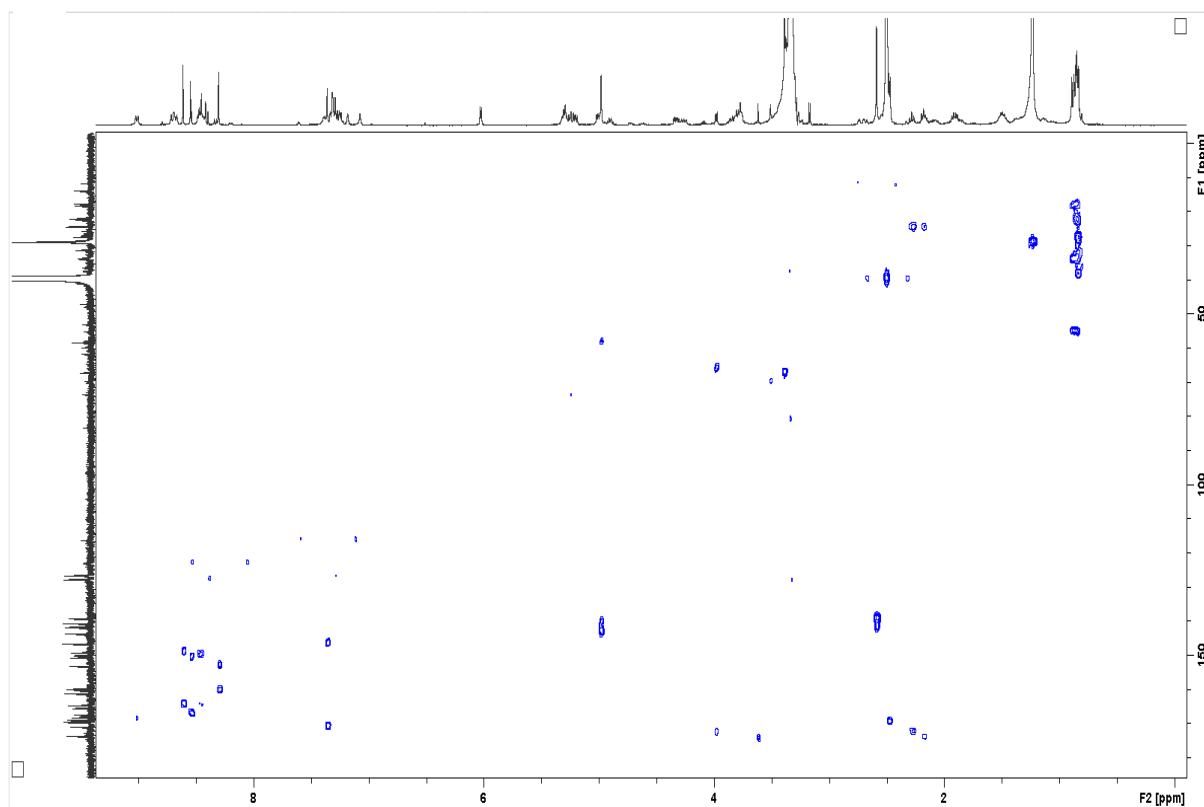

**Figure S35.** HMBC spectrum of **6**.

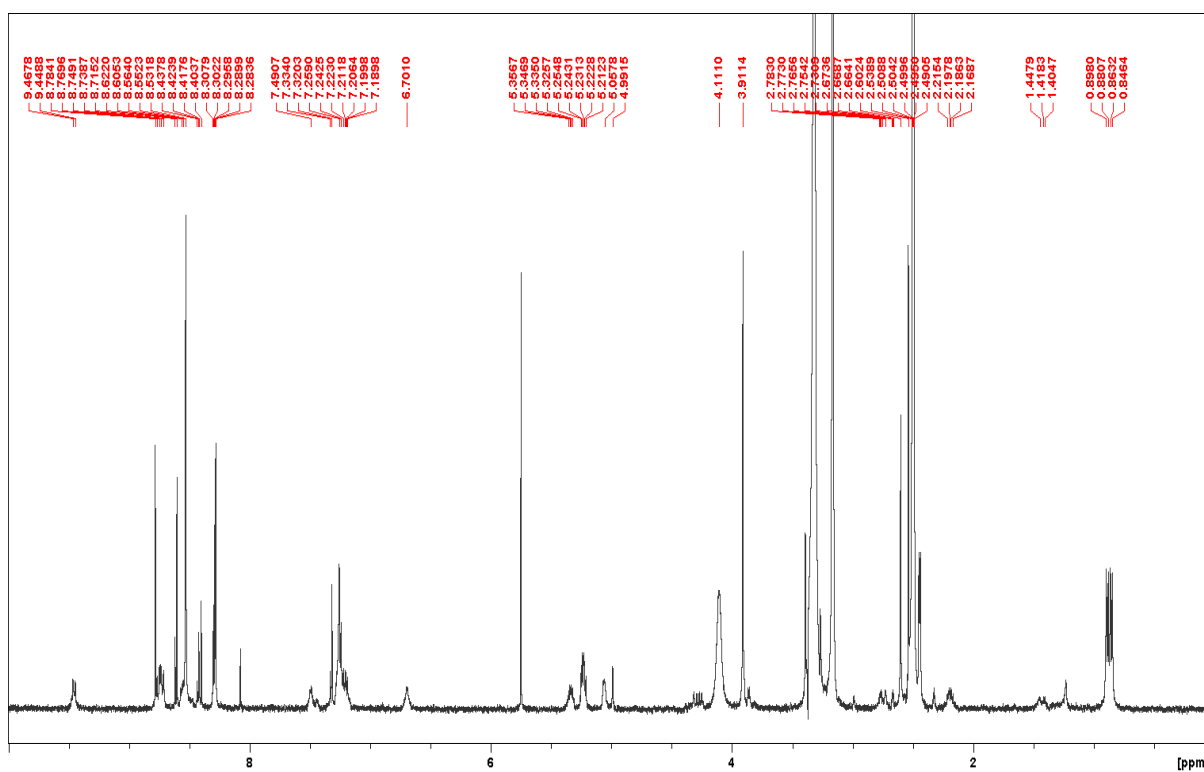

**Figure S36.**  $^1\text{H}$  NMR spectrum ( $\text{DMSO-}d_6$ , 400 MHz) of **7**.

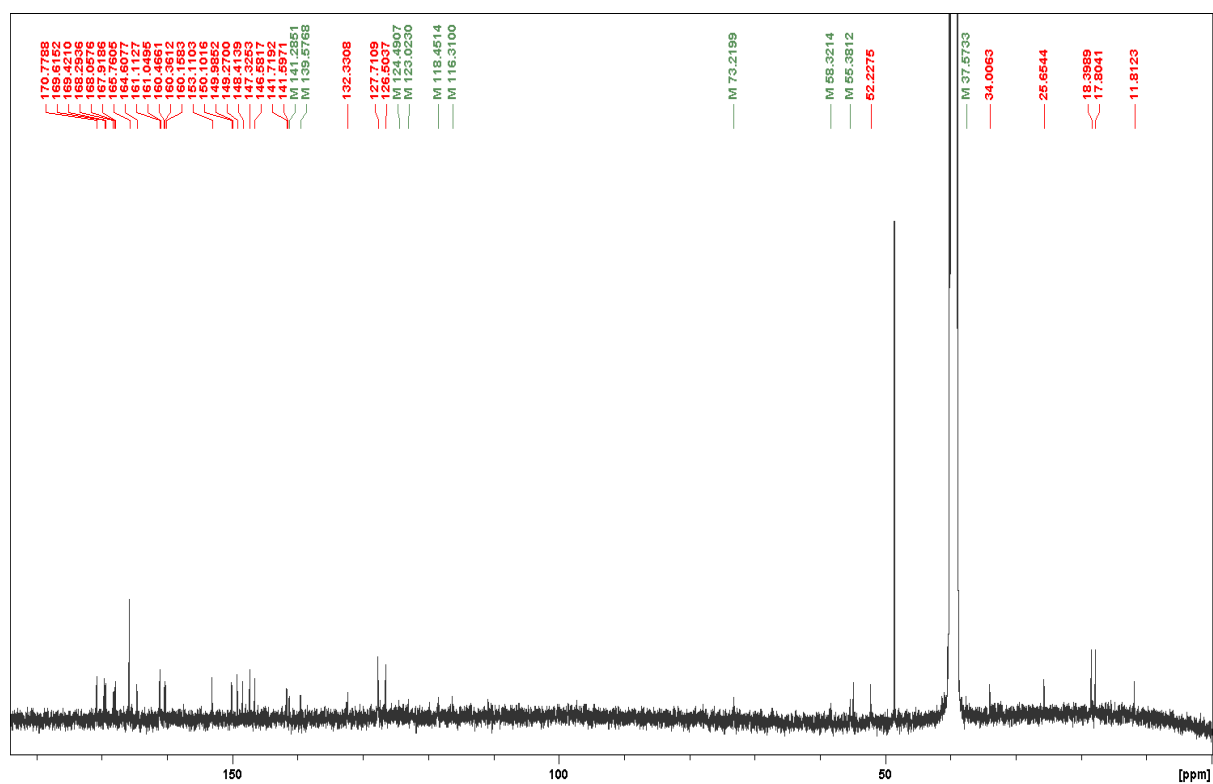

**Figure S37.**  $^{13}\text{C}$  NMR spectrum ( $\text{DMSO-}d_6$ , 100 MHz) of **7**.

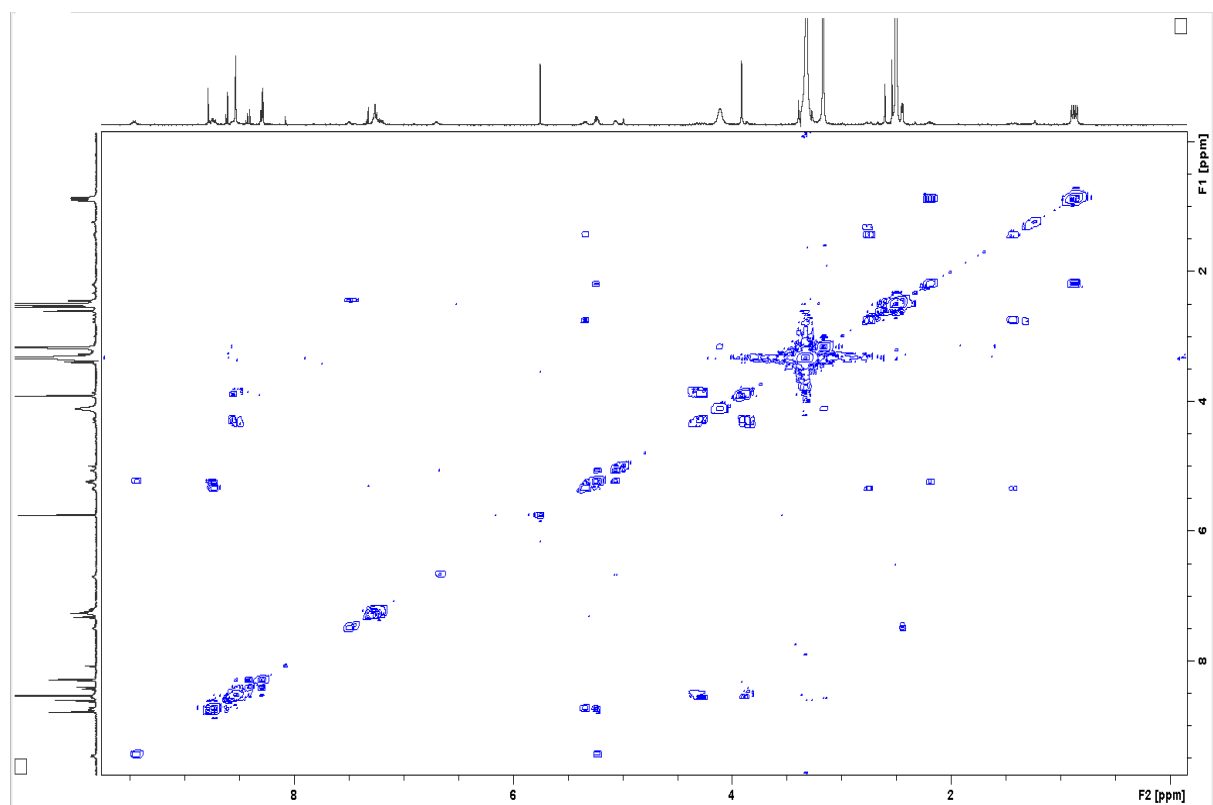

**Figure S38.** COSY spectrum of **7**.

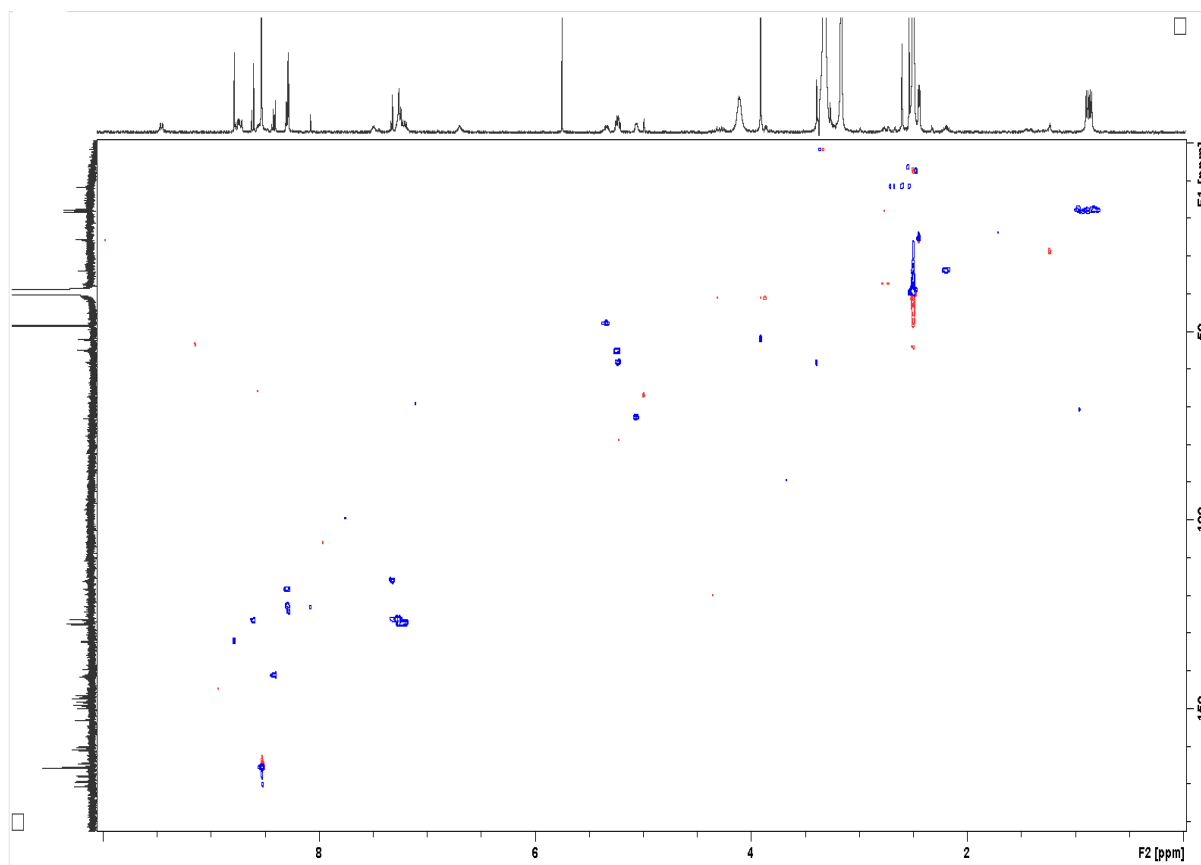

**Figure S39.** HSQC spectrum of **7**.

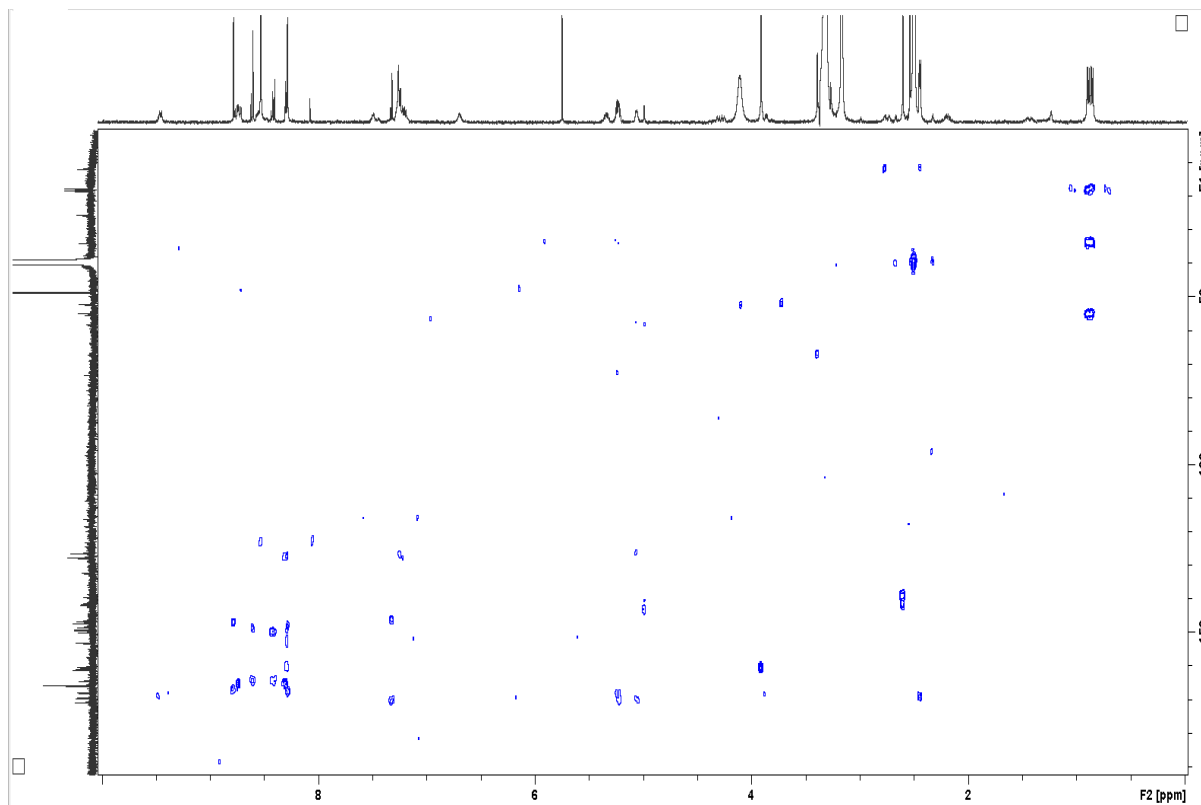

**Figure S40.** HMBC spectrum of **7**.

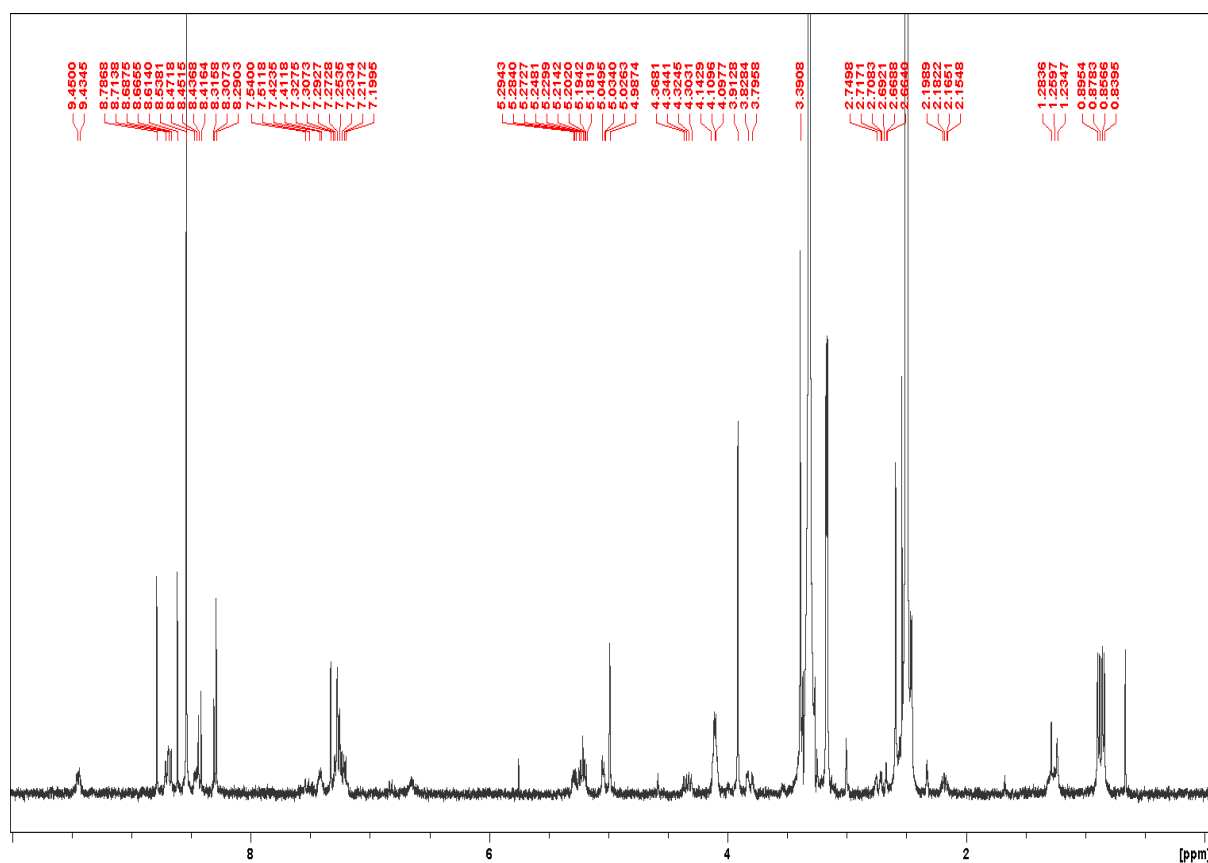

**Figure S41.** <sup>1</sup>H NMR spectrum (DMSO-*d*<sub>6</sub>, 400 MHz) of **8**.

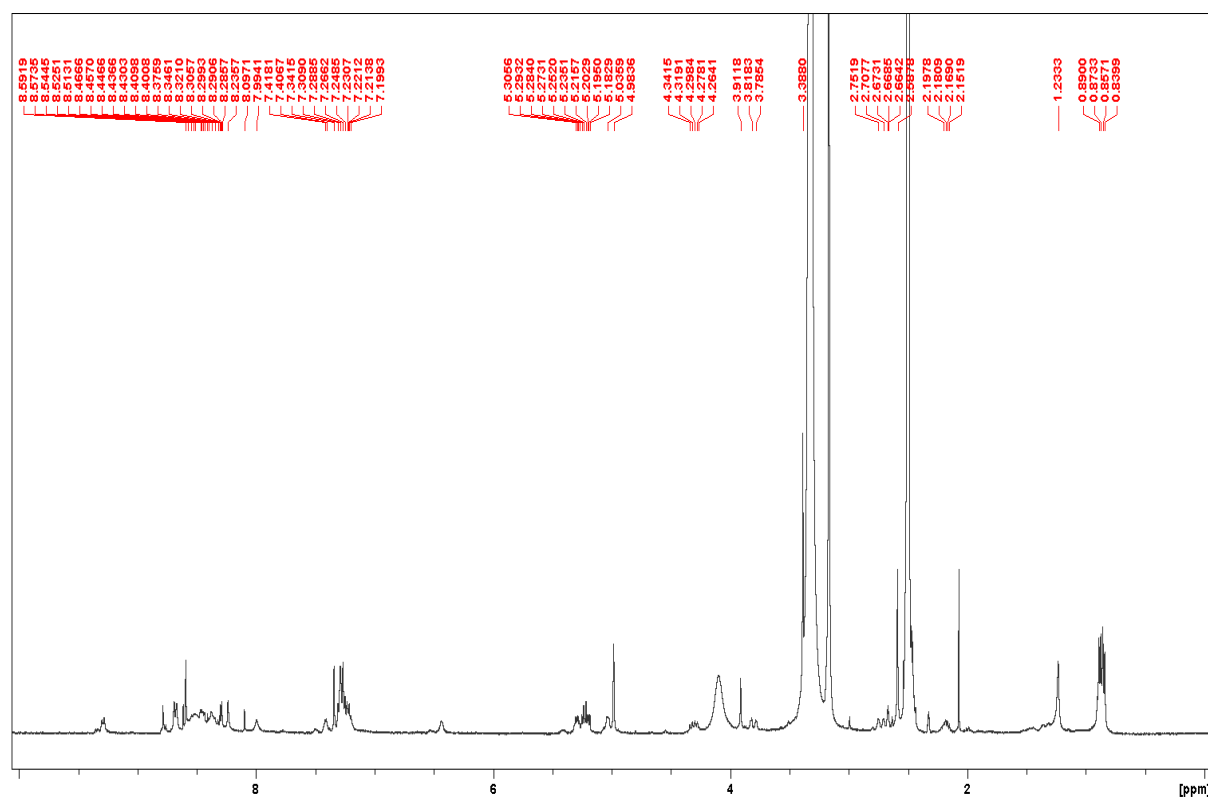

**Figure S42.** <sup>1</sup>H NMR spectrum (DMSO-*d*<sub>6</sub>, 400 MHz) of **9**.

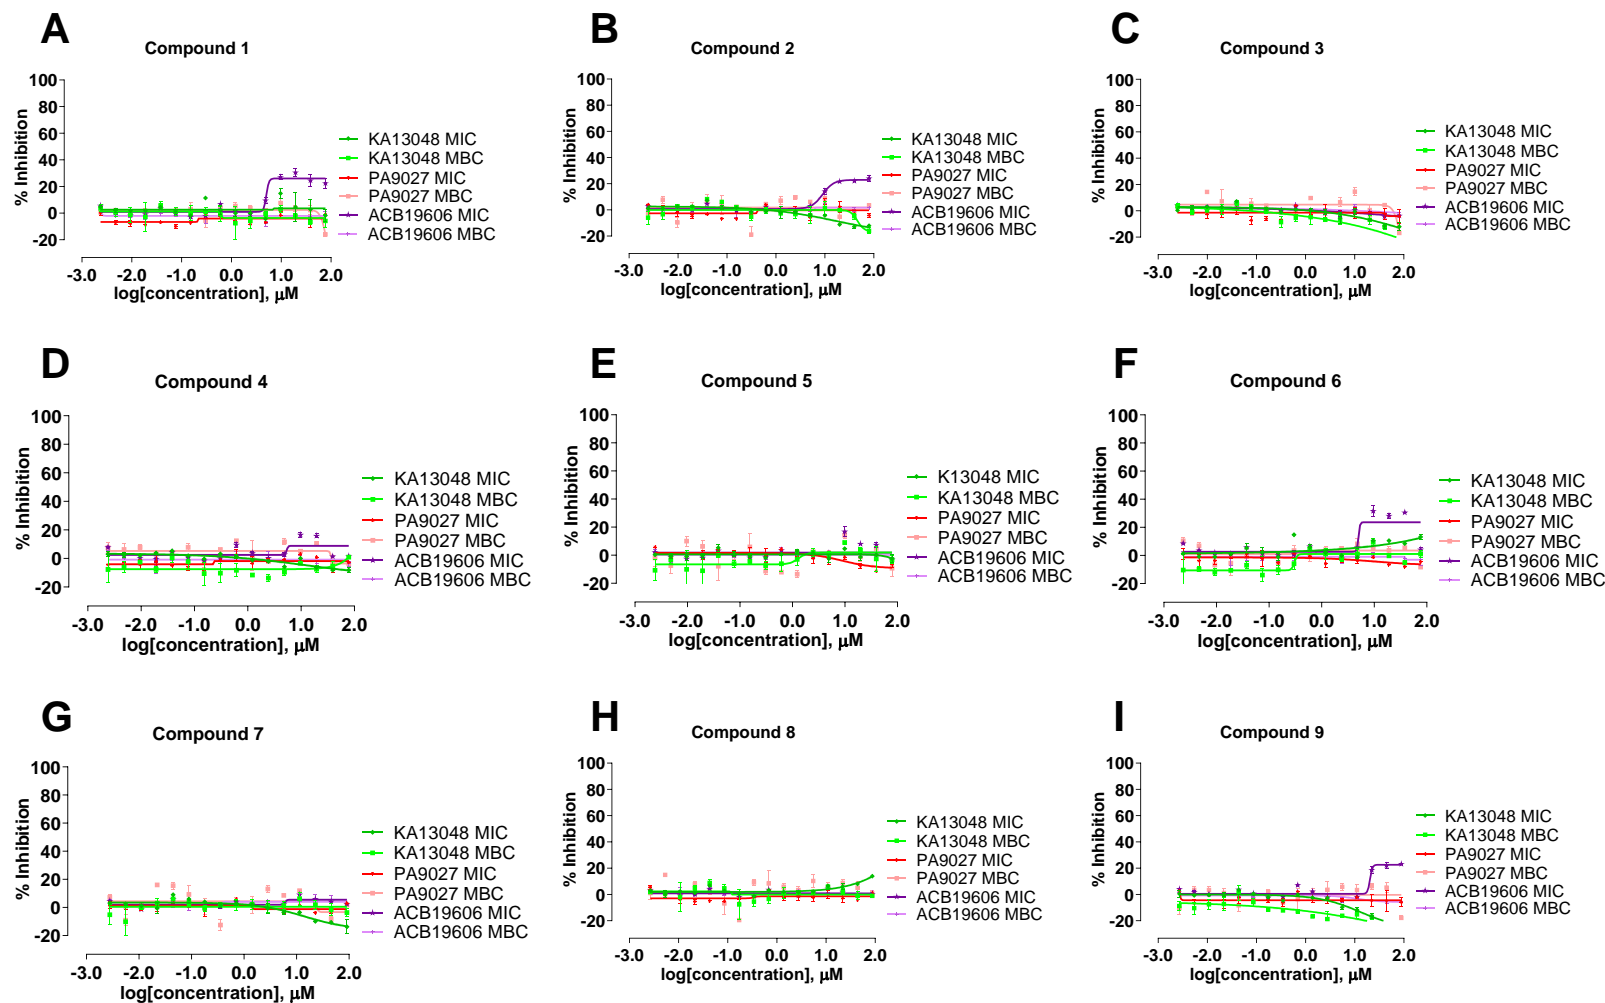

**Figure S43.** Inhibitory effect dose response curve against *Klebsiella aerogenes* (ATCC® 13048™), *Pseudomonas aeruginosa* (ATCC® 9027™) and *Acinetobacter baumannii* (ATCC® 19606™). **A)** Compound 1, **B)** Compound 2, **C)** Compound 3, **D)** Compound 4, **E)** Compound 5, **F)** Compound 6, **G)** Compound 7, **H)** Compound 8, **I)** Compound 9.

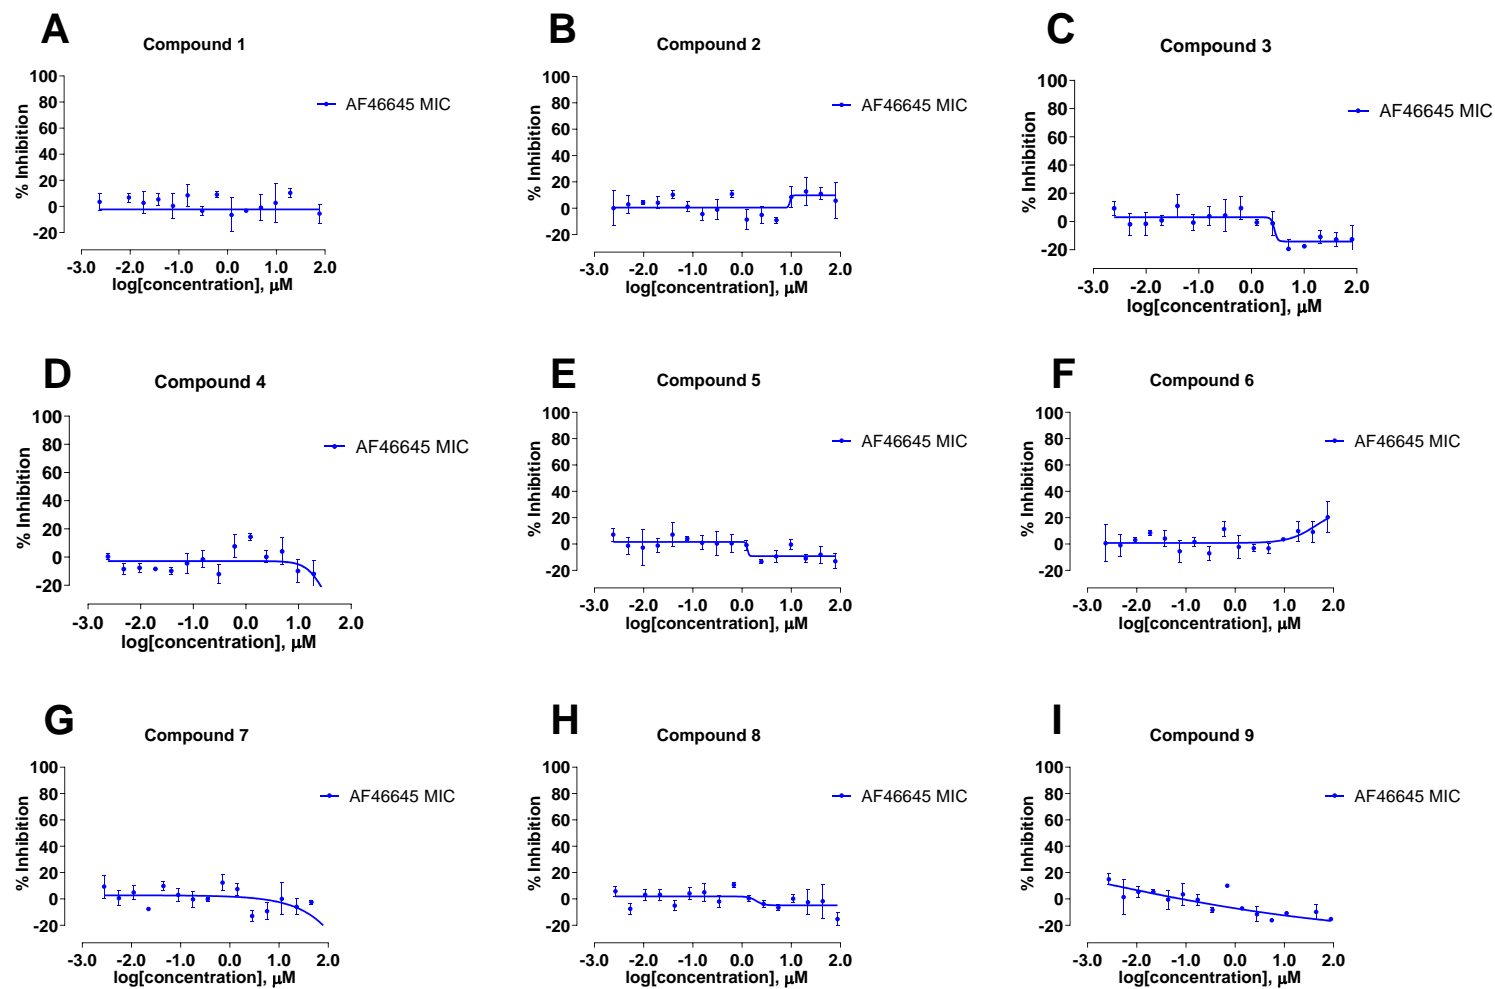

**Figure S44.** Inhibitory effect dose response curve against *Aspergillus fumigatus* (ATCC® 46645™). **A)** Compound 1, **B)** Compound 2, **C)** Compound 3, **D)** Compound 4, **E)** Compound 5, **F)** Compound 6, **G)** Compound 7, **H)** Compound 8, **I)** Compound 9.

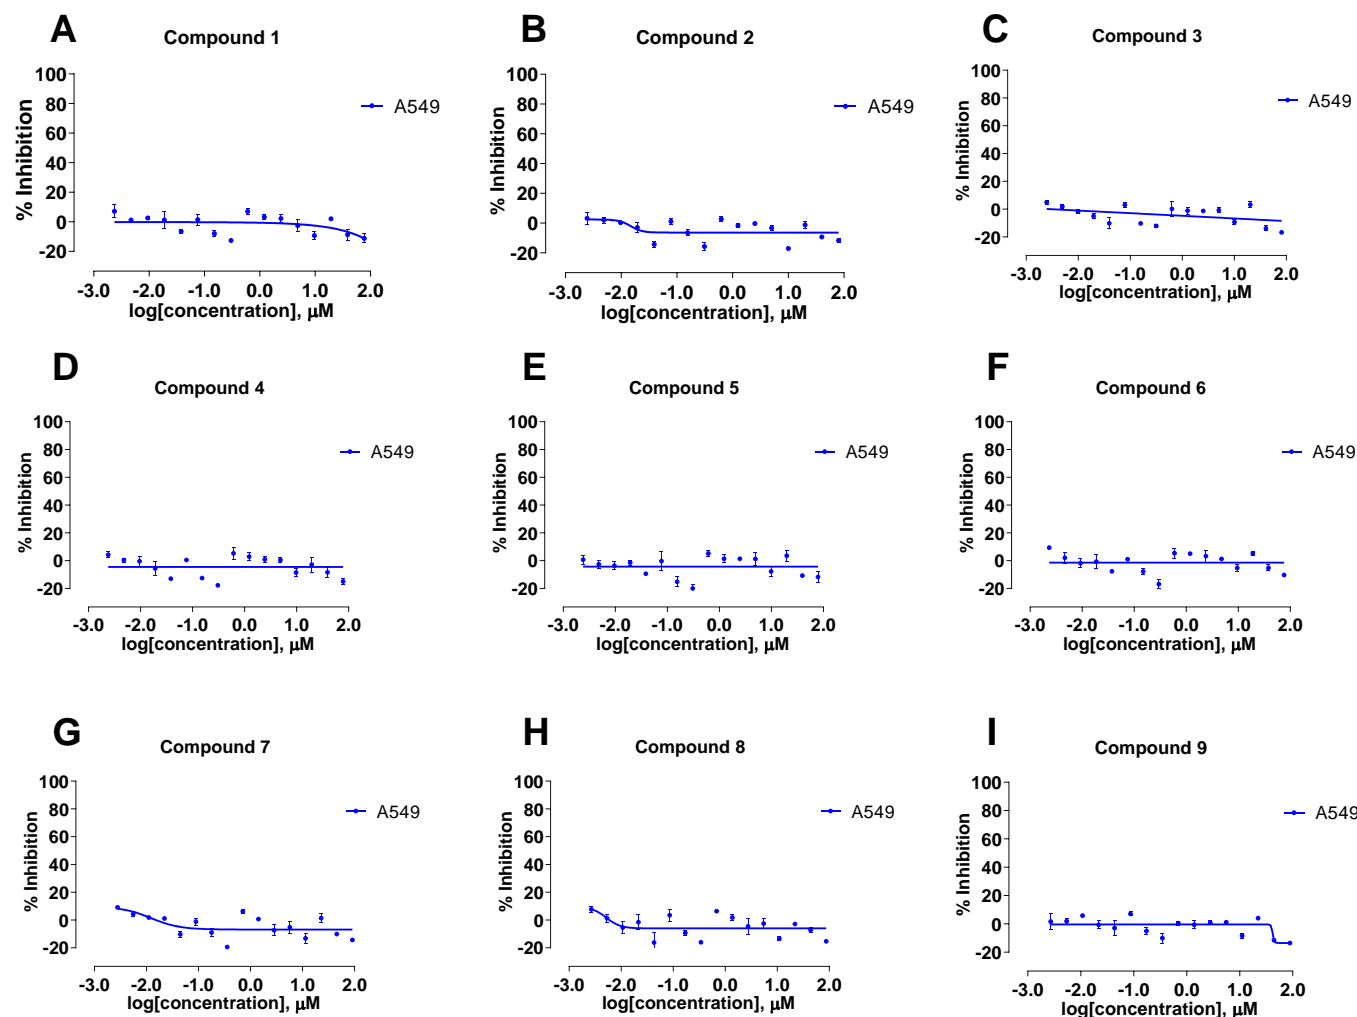

**Figure S45.** Inhibitory effect dose response curve against A549 Human lung carcinoma cells (ATCC® CCL-185™). **A)** Compound 1, **B)** Compound 2, **C)** Compound 3, **D)** Compound 4, **E)** Compound 5, **F)** Compound 6, **G)** Compound 7, **H)** Compound 8, **I)** Compound 9.
